# Supplementary material for: A comprehensive survey of cytotoxic active half-sandwich Ir(iii) complexes: structural perspective, and mechanism of action
Source: Royal Society of Chemistry journal article supplement (doi:10.1039/d4dt03219e), 2025-01-01
Supplement: d4dt03219e1.pdf [file d4dt03219e1.pdf]

**Table S1** IC<sub>50</sub> values of **1–49** against cancer and normal cell lines, at different incubation time, mechanism of action, target and cell cycle arrest.

| Complex Number                                | Cell line/IC <sub>50</sub> (μM) <sup>1,2</sup> |                        |                                    | Mechanism of action | Cell Cycle arrest | Target | Ref. |
|-----------------------------------------------|------------------------------------------------|------------------------|------------------------------------|---------------------|-------------------|--------|------|
| <b>3.1. C, N, P and S Monodentate ligands</b> |                                                |                        |                                    |                     |                   |        |      |
| <b>1a</b>                                     | 518A2; > 50                                    | DLD-1; > 100           | KB-V1; n.d                         | Trx-R inhibition    | n.d               |        | 160  |
|                                               | HCT-116; n.d                                   | MCF-7; n.d             | PANC-1; > 100                      |                     |                   |        |      |
|                                               | HT-29; n.d                                     |                        |                                    |                     |                   |        |      |
| <b>1b</b>                                     | 518A2; > 100                                   | DLD-1; > 100           | KB-V1; n.d                         |                     |                   |        |      |
|                                               | HCT-116; n.d                                   | MCF-7; n.d             | PANC-1; > 100                      |                     |                   |        |      |
|                                               | HT-29; n.d                                     |                        |                                    |                     |                   |        |      |
| <b>2a</b>                                     | HCT-116 (SRB); 84 ± 1                          | NCI-H460 (SRB); > 100  | SiHa (SRB); > 100                  |                     |                   |        |      |
|                                               | SW480 (SRB); > 100                             |                        |                                    |                     |                   |        |      |
| <b>2b</b>                                     | HCT-116; 21 ± 1                                | NCI-H460; 26 ± 2       | SiHa; 30 ± 2                       |                     |                   |        |      |
|                                               | SW480; 24 ± 1                                  |                        |                                    |                     |                   |        |      |
| <b>3<sup>T</sup></b>                          | HCT-116 p53 <sup>+/+</sup> ; 24 ± 2            | A2780cisR; 14.9 ± 0.8  | PNT2 <sup>(N)</sup> ; 33.23 ± 0.06 |                     |                   |        |      |
|                                               | A2780; 6.4 ± 0.2                               | MCF-7; 66 ± 1          |                                    |                     |                   |        |      |
| <b>4a</b>                                     | HCT-116 (SRB); 46 ± 8                          | NCI-H460 (SRB); 43 ± 6 | SiHa (SRB); 36 ± 4                 |                     |                   |        |      |
|                                               | SW480 (SRB); 77 ± 3                            |                        |                                    |                     |                   |        |      |
| <b>4b</b>                                     | HCT-116; 25 ± 1                                | NCI-H460; 41 ± 5       | SiHa; 26 ± 2                       |                     |                   |        |      |
|                                               | SW480; 28 ± 5                                  |                        |                                    |                     |                   |        |      |
| <b>5</b>                                      | HCT-116 (SRB); >100                            | NCI-H460 (SRB); >100   | SiHa (SRB); >100                   |                     | n.d               |        | 164  |

|                         |                                      |                                          |                                          |            |                        |            |           |                   |     |
|-------------------------|--------------------------------------|------------------------------------------|------------------------------------------|------------|------------------------|------------|-----------|-------------------|-----|
|                         |                                      |                                          |                                          |            |                        |            |           |                   |     |
| <b>6a</b>               | HT-29; 92.0 ± 1.0                    | A2780; n.d                               | A2780cis; n.d                            |            |                        |            | n.d       |                   | 157 |
| <b>6b</b> *             | HCT-116; > 100                       | MIA-PaCa-2; > 100                        | ARPE-19/ <sup>(N)</sup> ; >100           |            | Inactive               |            | n.d       |                   | 165 |
| <b>6c</b>               | A549; 92.3 ± 3.1                     | Hela; > 100                              | BEAS-2B <sup>(N)</sup> ; n.d             |            |                        |            | n.d       |                   | 31  |
| <b>7</b> *              | HCT-116; 37.79 ± 4.89                | MIA-PaCa-2; 52.13 ± 12.28                | ARPE-19 <sup>(N)</sup> ; >100            |            |                        |            | n.d       |                   | 165 |
| <b>8a</b> <sup>T</sup>  | HT-29; 4.82 ± 0.85                   | HCT-116 p53 <sup>+/+</sup> ; 4.23 ± 0.64 | HCT-116 p53 <sup>-/-</sup> ; 5.17 ± 1.13 |            |                        |            | n.d       |                   | 166 |
|                         | ARPE-19 <sup>(N)</sup> ; 7.35 ± 3.42 |                                          |                                          |            |                        |            |           |                   |     |
| <b>8b</b> *             | HT-29; > 100                         | HCT-116 p53 <sup>+/+</sup> ; > 100       | HCT-116 p53 <sup>-/-</sup> ; > 100       |            |                        |            |           |                   |     |
|                         | ARPE-19 <sup>(N)</sup> ; >100        |                                          |                                          |            |                        |            |           |                   |     |
| <b>9a</b> <sup>T</sup>  | A549                                 | 39.2 ± 2.2                               | HeLa                                     | >100       | BEAS-2B <sup>(N)</sup> | 65.7 ± 1.3 | ROS/NADH  | n.d               | 166 |
| <b>9b</b> <sup>T</sup>  |                                      | 35.6 ± 1.3                               |                                          | >100       |                        | 68.3 ± 2.2 |           |                   |     |
| <b>9c</b> <sup>T</sup>  |                                      | 43.7 ± 1.2                               |                                          | 57.4 ± 1.5 |                        | 66.9 ± 2.1 | ROS/NADH  |                   |     |
| <b>9d</b> <sup>T</sup>  |                                      | 36.5 ± 2.4                               |                                          | 52.6 ± 1.3 |                        | 53.8 ± 1.4 |           |                   |     |
| <b>10a</b> <sup>T</sup> |                                      | 31.4 ± 1.7                               |                                          | 67.7 ± 0.6 |                        | 77.6 ± 2.2 | ROS/NADH  | G <sub>2</sub> /M |     |
| <b>10b</b> <sup>T</sup> |                                      | 26.7 ± 0.9                               |                                          | 33.5 ± 1.3 |                        | 83.2 ± 1.7 | <b>1A</b> | Mitochondria      |     |
| <b>10c</b> <sup>T</sup> |                                      | 36.8 ± 1.2                               |                                          | 85.5 ± 1.6 |                        | 65.6 ± 2.3 |           | n.d               |     |
| <b>10d</b> <sup>T</sup> |                                      | 40.5 ± 1.4                               |                                          | 42.4 ± 2.4 |                        | 73.0 ± 0.9 |           |                   |     |
| <b>10e</b> <sup>T</sup> |                                      | 72.1 ± 1.2                               |                                          | 78.9 ± 1.7 |                        | 82.6 ± 1.1 |           |                   |     |

|                        |                                    |                               |                                              |            |                         |                      |                          |             |     |  |
|------------------------|------------------------------------|-------------------------------|----------------------------------------------|------------|-------------------------|----------------------|--------------------------|-------------|-----|--|
| <b>10f<sup>T</sup></b> |                                    | 65.6 ± 1.2                    |                                              | 67.3 ± 0.7 |                         | 78.4 ± 1.0           |                          |             |     |  |
| <b>11</b>              | A2780                              | > 500                         |                                              |            |                         | Inhibit Cathpesin B. | n.d                      |             | 167 |  |
| <b>12</b>              | (bovine                            | > 500                         |                                              |            |                         |                      |                          |             |     |  |
| <b>13</b>              | cat B)                             | 349 ± 10                      |                                              |            |                         |                      |                          |             |     |  |
| <b>14</b>              |                                    | > 500                         |                                              |            |                         |                      |                          |             |     |  |
| <b>15a</b>             | 518A2 (SRB); 0.3 ± 0.1             | 8505C (SRB); 0.2 ± 0.0        | A253 (SRB); 0.2 ± 0.0                        |            | ROS/RNS/Apoptosis.      | n.d                  |                          | 168,<br>169 |     |  |
|                        | MCF-7 (SRB); 0.2 ± 0.1             | SW480 (SRB); 0.6 ± 0.2        |                                              |            |                         |                      |                          |             |     |  |
| <b>15b</b>             | 518A2 (SRB); 0.7 ± 0.4             | 8505C (SRB); 0.6 ± 0.0        | A253 (SRB); 0.5 ± 0.1                        |            |                         |                      |                          |             |     |  |
|                        | MCF-7 (SRB); 0.3 ± 0.0             | SW480 (SRB); 1.0 ± 0.4        |                                              |            |                         |                      |                          |             |     |  |
| <b>15c</b>             | 518A2; 4.4 ± 2.5                   | 8505C; 5.8 ± 1.3              | A253; 4.9 ± 0.1                              |            |                         |                      |                          |             |     |  |
|                        | MCF-7; 6.7 ± 1.4                   | SW480; 4.5 ± 0.1              |                                              |            |                         |                      |                          |             |     |  |
| <b>16a</b>             | 518A2; 1.0 ± 0.6                   | 8505C; 0.5 ± 0.2              | A253; 0.4 ± 0.0                              |            |                         |                      |                          |             |     |  |
|                        | MCF-7; 0.4 ± 0.1                   | SW480; 1.0 ± 0.3              |                                              |            |                         |                      |                          |             |     |  |
| <b>16b</b>             | 518A2; 0.4 ± 0.2                   | 8505C; 0.3 ± 0.1              | A253; 0.3 ± 0.1                              |            |                         |                      |                          |             |     |  |
|                        | MCF-7; 0.1 ± 0.1                   | SW480; 0.9 ± 0.4              |                                              |            |                         |                      |                          |             |     |  |
| <b>17</b>              | Sk-mel (WST-1; Roche);<br>510      | SH-4 (WST-1; Roche); 300      | Colo-829 (WST-1; Roche);<br>480              |            |                         | n.d                  |                          | 170         |     |  |
|                        | C-32 (WST-1; Roche); 560           | MCF-7 (WST-1; Roche); 370     | T47D (WST-1; Roche); 450                     |            |                         |                      |                          |             |     |  |
|                        | MDA-MB-231 (WST-1; Roche); 7.8 ± 1 |                               |                                              |            |                         |                      |                          |             |     |  |
| <b>18a<sup>T</sup></b> | CT26 (24h); n.d                    | MCF-7 (24h); 65.7 ± 2.8       | DU-145 (24h); 11.8 ± 1.1                     |            | <b>2A</b><br>DNA damage | G <sub>2</sub> /M    | Nucleus and<br>cytoplasm | 25, 171     |     |  |
|                        | A549 (24h); 68.8 ± 1.7             | PANC-1 (24h); 43.0 ± 1.3      | HEK-293T <sup>(N)</sup> (24h); 42.1 ±<br>2.1 |            |                         |                      |                          |             |     |  |
| <b>18a<sup>T</sup></b> | CT26 (24h + 48h); 6.4 ± 0.3        | MCF-7 (24h + 48h); 35.0 ± 0.9 | DU-145 (24h + 48h); 4.8 ±                    |            |                         |                      |                          |             |     |  |

|                         |                                 |                               |                                                    |  |            |                   |     |
|-------------------------|---------------------------------|-------------------------------|----------------------------------------------------|--|------------|-------------------|-----|
|                         |                                 |                               | 0.1                                                |  |            |                   |     |
|                         | A549 (24h + 48h);<br>29.5 ± 0.7 | PANC-1 (24h + 48h); 8.7 ± 0.2 | HEK-293T <sup>(N)</sup> (24h + 48h);<br>28.5 ± 1.5 |  |            |                   |     |
| <b>18b</b> <sup>T</sup> | CT26 (24h); n.d                 | MCF-7 (24h); 68.8 ± 5.3       | DU-145 (24h); 12.9 ± 2.1                           |  | DNA damage | G <sub>2</sub> /M | n.d |
|                         | A549 (24h); 71.4 ± 1.6          | PANC-1 (24h); 42.6 ± 18.1     | HEK-293T <sup>(N)</sup> (24h); 41.8 ±<br>1.7       |  |            |                   |     |
| <b>18b</b> <sup>T</sup> | CT26 (24h + 48h); 5.6 ± 0.4     | MCF-7 (24h + 48h); 29.3 ± 0.2 | DU-145 (24h + 48h); 5.5 ±<br>0.2                   |  | DNA damage | G <sub>2</sub> /M | n.d |
|                         | A549 (24h + 48h); 26.7 ±<br>1.6 | PANC-1 (24h + 48h); 7.8 ± 0.6 | HEK-293T <sup>(N)</sup> (24h + 48h);<br>21.4 ± 1.2 |  |            |                   |     |
| <b>18c</b> <sup>T</sup> | CT26 (24h); n.d                 | MCF-7 (24h); 61.8 ± 4.1       | DU-145 (24h); 9.1 ± 0.5                            |  | DNA damage | G <sub>2</sub> /M | n.d |
|                         | A549 (24h); 64.8 ± 2.8          | PANC-1 (24h); 40.3 ± 4.1      | HEK-293T <sup>(N)</sup> (24h); 44.1 ±<br>1.2       |  |            |                   |     |
| <b>18c</b> <sup>T</sup> | CT26 (24h + 48h); 4.1 ± 0.7     | MCF-7 (24h + 48h); 29.3 ± 0.2 | DU-145 (24h + 48h);<br>23.0 ± 1.7                  |  | DNA damage | G <sub>2</sub> /M | n.d |
|                         | A549 (24h + 48h);<br>27.4 ± 1.7 | PANC-1 (24h + 48h); 7.8 ± 0.6 | HEK-293T <sup>(N)</sup> (24h + 48h);<br>28.0 ± 1.7 |  |            |                   |     |
| <b>18d</b> <sup>T</sup> | CT26 (24h); n.d                 | MCF-7 (24h); 35 ± 0.9         | DU-145 (24h); 9.1 ± 0.5                            |  | DNA damage | G <sub>2</sub> /M | n.d |
|                         | A549 (24h); 69.7 ± 4.1          | PANC-1 (24h); 8.7 ± 0.3       | HEK-293T <sup>(N)</sup> (24h); 28.5 ±<br>1.5       |  |            |                   |     |
| <b>18d</b> <sup>T</sup> | CT26 (24h + 48h); 5.8 ± 0.2     | MCF-7 (24h+48h); 33.7 ± 3.8   | DU-145 (24h + 48h);<br>5.1 ± 0.4                   |  | DNA damage | G <sub>2</sub> /M | n.d |
|                         | A549 (24h + 48h); 27.4 ±<br>1.7 | PANC-1 (24h + 48h); 8.1 ± 1.1 | HEK-293T <sup>(N)</sup> (24h + 48h);<br>28.0 ± 1.7 |  |            |                   |     |

|                                                          |                 |                 |              |                    |                                                                        |                       |             |
|----------------------------------------------------------|-----------------|-----------------|--------------|--------------------|------------------------------------------------------------------------|-----------------------|-------------|
| <b>19</b>                                                | MCF-7; 85 ± 8   | Du-145; 19 ± 3  | A549; 12 ± 3 |                    | S-phase at low conc.<br>G <sub>0</sub> /G <sub>1</sub> - at high conc. | Nucleus and cytoplasm | 172         |
|                                                          | PANC-1; 91 ± 13 | HaCaT; 320 ± 19 |              |                    |                                                                        |                       |             |
| <b>20</b>                                                | MCF-7; 56 ± 6   | Du-145; 13 ± 2  | A549; 16 ± 3 |                    | n.d                                                                    |                       |             |
|                                                          | PANC-1; 85 ± 16 | HaCaT; 302 ± 22 |              |                    |                                                                        |                       |             |
| <b>3.2.1. Bidentate ligands (C<sup>∧</sup>C ligands)</b> |                 |                 |              |                    |                                                                        |                       |             |
| <b>21a</b>                                               | HeLa            | > 100           |              | NADH               | n.d                                                                    | Lysosome              | 173,<br>174 |
| <b>21b</b>                                               |                 | 22.6 ± 0.9      |              | <b>1B</b>          | G <sub>0</sub> /G <sub>1</sub>                                         |                       |             |
| <b>21c</b>                                               |                 | 8.3 ± 0.9       |              |                    |                                                                        |                       | NADH        |
| <b>21d</b>                                               |                 | 46.3 ± 1.6      |              | NADH/ROS/Apoptosis | disrupt G <sub>1</sub> , G <sub>2</sub> /M                             |                       |             |
| <b>21e</b>                                               |                 | 15.3 ± 0.2      |              |                    |                                                                        |                       | NADH        |
| <b>21f</b>                                               |                 | 5.8 ± 0.3       |              | NADH/ROS/Apoptosis | disrupt G <sub>1</sub> , G <sub>2</sub> /M                             |                       |             |
| <b>21g</b>                                               |                 | 18.1 ± 0.1      |              |                    |                                                                        |                       | NADH        |
| <b>21h</b>                                               |                 | 5.8 ± 0.5       |              | NADH/ROS/Apoptosis | disrupt G <sub>1</sub> , G <sub>2</sub> /M                             |                       |             |
| <b>21i</b>                                               |                 | 3.4 ± 0.1       |              |                    |                                                                        |                       | NADH        |
| <b>21j</b>                                               |                 | 7.7 ± 0.1       |              | NADH               | n.d                                                                    |                       |             |
| <b>21k</b>                                               |                 | 5.2 ± 0.3       |              |                    |                                                                        |                       | NADH        |
| <b>21l</b>                                               |                 | 2.9 ± 0.1       |              | NADH               | n.d                                                                    |                       |             |
| <b>22a</b>                                               |                 | 11.8 ± 1.2      |              |                    |                                                                        | NADH                  | n.d.        |
| <b>22b</b>                                               |                 | 5.9 ± 0.4       |              | <b>1A</b>          | Disturb sub-                                                           |                       |             |

|                                                         |                    |                   |                                  |                   |                 |  |              |                |                           |              |
|---------------------------------------------------------|--------------------|-------------------|----------------------------------|-------------------|-----------------|--|--------------|----------------|---------------------------|--------------|
|                                                         | A549               |                   |                                  |                   |                 |  |              | G <sub>1</sub> |                           |              |
| <b>22c</b>                                              |                    |                   | 4.6 ± 0.2                        |                   |                 |  | <b>1AB</b>   | S-phase        | Lysosome<br>/Mitochondria |              |
| <b>22d</b>                                              |                    |                   | 3.9 ± 0.7                        |                   |                 |  | NADH         | n.d.           |                           |              |
| <b>3.2.2. Bidentate ligands (C<sup>o</sup> ligands)</b> |                    |                   |                                  |                   |                 |  |              |                |                           |              |
| <b>23</b>                                               |                    |                   | 10.8 ± 1.7                       |                   |                 |  | DNA Damage   | n.d.           |                           | 176          |
| <b>24a</b>                                              |                    |                   | 3.28 ± 0.14                      |                   |                 |  |              |                |                           | 177          |
| <b>24b</b>                                              | A2780              |                   | 2.55 ± 0.03                      |                   |                 |  |              |                |                           |              |
| <b>24c</b>                                              | (SRB)              |                   | 6.53 ± 0.50                      |                   |                 |  |              |                |                           |              |
| <b>24d</b>                                              |                    |                   | 2.14 ± 0.50                      |                   |                 |  |              |                |                           |              |
| <b>24e</b>                                              |                    |                   | 0.70 ± 0.04                      |                   |                 |  |              |                |                           |              |
| <b>24f<sup>T</sup></b>                                  | B16; 2.5 ± 0.2     | SW620; 2.6 ± 0.1  | C6; 2.4 ± 0.3                    | MCF-7; 8.6 ± 0.2  | <b>1A or 2A</b> |  | n.d.         | Mitochondria   | 180                       |              |
|                                                         | HCT-116; 8.0 ± 0.2 | A2780; 5.5 ± 0.5  | MRC-5 <sup>(N)</sup> ; 6.7 ± 0.2 |                   |                 |  |              |                |                           |              |
| <b>24g<sup>T</sup></b>                                  | B16; 6.7 ± 0.6     | SW620; 10.4 ± 0.4 | C6; 4.0 ± 0.3                    | MCF-7; 12.0 ± 1.3 |                 |  |              |                |                           |              |
|                                                         | HCT-116; 8.0 ± 0.6 | A2780; 7.3 ± 0.6  | MRC-5 <sup>(N)</sup> ; 3.7 ± 0.2 |                   |                 |  |              |                |                           |              |
| <b>24h<sup>T</sup></b>                                  | B16; 1.2 ± 0.2     | SW620; 2.0 ± 0.1  | C6; 2.00 ± 0.01                  | MCF-7; 2.5 ± 0.2  | <b>1A or 2A</b> |  |              |                |                           |              |
|                                                         | HCT-116; 1.3 ± 0.3 | A2780; 1.3 ± 0.1  | MRC-5 <sup>(N)</sup> ; 2.4 ± 0.3 |                   |                 |  |              |                |                           |              |
| <b>25</b>                                               | A549 (SRB); 0.56   |                   |                                  |                   | NADH/ROS        |  | n.d.         |                | 21                        |              |
| <b>26a</b>                                              | 4.5 ± 0.2          |                   | 3.7 ± 0.3                        |                   | 9.6 ± 0.4       |  | 10.36 ± 0.07 | NADH/ROS       | n.d.                      | DNA          |
| <b>26b</b>                                              | 2.7 ± 0.3          |                   | 6.8 ± 0.1                        |                   | 4.8 ± 0.3       |  | 2.1 ± 0.3    |                |                           | DNA/Cytosol  |
| <b>26c</b>                                              | > 50               |                   | n.d.                             |                   | n.d.            |  | n.d.         |                |                           | DNA          |
| <b>26d</b>                                              | > 60               |                   | n.d.                             |                   | n.d.            |  | n.d.         |                |                           | DNA/ Cytosol |

|            |                |              |                  |             |                |             |               |              |              |     |     |  |
|------------|----------------|--------------|------------------|-------------|----------------|-------------|---------------|--------------|--------------|-----|-----|--|
| <b>26e</b> | A2780<br>(SRB) | 6.9 ± 0.3    | HCT-116<br>(SRB) | 21.3 ± 0.7  | MCF-7<br>(SRB) | 11.6 ± 0.5  | A549<br>(SRB) | 15.8 ± 0.4   |              |     | DNA |  |
| <b>26f</b> |                | 4.4 ± 0.4    |                  | 18.8 ± 0.5  |                | 6.5 ± 0.3   |               | 5.9 ± 0.1    |              |     |     |  |
| <b>26g</b> |                | 24.73 ± 2.30 |                  | n.d         |                | n.d         |               | n.d          |              |     |     |  |
| <b>26h</b> |                | 2.7 ± 0.1    |                  | 27.5 ± 0.9  |                | 11.4 ± 0.4  |               | 20.1 ± 0.3   |              |     |     |  |
| <b>26i</b> |                | > 50         |                  | n.d         |                | n.d         |               | n.d          |              |     |     |  |
| <b>26j</b> |                | 47 ± 0.1     |                  | 57.3 ± 0.9  |                | 47 ± 2      |               | 89 ± 1       |              |     |     |  |
| <b>26k</b> |                | 47.3 ± 0.1   |                  | 29.3 ± 0.8  |                | 28.6 ± 0.9  |               | 56.67 ± 0.04 |              |     |     |  |
| <b>26l</b> |                | 13.29 ± 0.88 |                  | n.d         |                | n.d         |               | n.d          |              |     |     |  |
| <b>26m</b> |                | 1.18 ± 0.08  |                  | n.d         |                | n.d         |               | n.d          |              |     |     |  |
| <b>26n</b> |                | 3.9 ± 0.2    |                  | 9.6 ± 0.6   |                | 3.7 ± 0.1   |               | 8.7 ± 0.3    |              |     |     |  |
| <b>26o</b> | 1.26 ± 0.01    | n.d          | n.d              | n.d         |                |             |               |              |              |     |     |  |
| <b>27a</b> | A2780          | 1.0 ± 0.1    | A549             | 3.98 ± 0.06 | MCF-7          | 1.82 ± 0.08 | ROS/MMP       | No effect    | Mitochondria | 185 |     |  |
| <b>27b</b> |                | 0.80 ± 0.01  |                  | 4.3 ± 0.2   |                | 3.8 ± 0.1   | n.d           |              |              |     |     |  |
| <b>27c</b> |                | 1.26 ±       |                  | 4.0 ± 0.1   |                | 2.4 ± 0.2   |               |              |              |     |     |  |

|                        |                             |             |                               |             |                                         |             |                        |           |              |                   |          |    |
|------------------------|-----------------------------|-------------|-------------------------------|-------------|-----------------------------------------|-------------|------------------------|-----------|--------------|-------------------|----------|----|
|                        | (SRB)                       | 0.07        | (SRB)                         |             | (SRB)                                   |             |                        |           |              |                   |          |    |
| <b>27d</b>             |                             | 1.42 ± 0.04 |                               | 4.7 ± 0.9   |                                         | 2.55 ± 0.07 |                        |           |              |                   |          |    |
| <b>27e</b>             |                             | 0.32 ± 0.06 |                               | 0.62 ± 0.06 |                                         | 0.20 ± 0.04 | ROS/MMP                | No effect | Mitochondria |                   |          |    |
| <b>27f</b>             |                             | 1.4 ± 0.2   |                               | 6.5 ± 0.8   |                                         | 3.9 ± 0.3   |                        | n.d       |              |                   |          |    |
| <b>27g</b>             |                             | 1.4 ± 0.3   |                               | 5.9 ± 0.9   |                                         | 2.7 ± 0.2   |                        |           |              |                   |          |    |
| <b>27h</b>             |                             | 1.6 ± 0.3   |                               | 15.9 ± 0.3  |                                         | 8.8 ± 0.8   |                        |           |              |                   |          |    |
| <b>28a<sup>T</sup></b> | A2780 (MTS); 0.56 ± 0.04    |             | MDA-MB-231 (MTS); 0.52 ± 0.03 |             | MRC-5 <sup>(N)</sup> (MTS); 2.35 ± 0.09 |             | NADH                   | n.d       |              |                   | 186      |    |
|                        | A2780cis (MTS); 1.08 ± 0.05 |             |                               |             |                                         |             |                        |           |              |                   |          |    |
| <b>28b</b>             | A2780 (MTS); n.d            |             | MDA-MB-231 (MTS); n.d         |             | MRC-5 <sup>(N)</sup> (MTS); n.d         |             | NADH                   |           |              |                   |          |    |
|                        | A2780cis (MTS); n.d         |             |                               |             |                                         |             |                        |           |              |                   |          |    |
| <b>29a<sup>T</sup></b> | A549                        | 3.9 ± 0.1   | HeLa                          | 3.3 ± 0.5   | HepG2                                   | 3.1 ± 0.1   | BEAS-2B <sup>(N)</sup> | 1.8 ± 0.2 | <b>1B</b>    | G <sub>2</sub> /M | Lysosome | 30 |
| <b>29b<sup>T</sup></b> |                             | 3.9 ± 0.1   |                               | 3.6 ± 0.3   |                                         | 2.5 ± 0.1   |                        | 2.4 ± 0.2 | NADH         |                   |          |    |
| <b>29c<sup>T</sup></b> |                             | 12.8 ± 0.6  |                               | 14.8 ± 2.6  |                                         | 11.9 ± 0.7  |                        | 5.0 ± 0.1 | <b>1B</b>    | G <sub>2</sub> /M | Lysosome |    |
| <b>29d<sup>T</sup></b> |                             | 8.6 ± 0.3   |                               | 8.1 ± 0.1   |                                         | 11.4 ± 0.7  |                        | 8.9 ± 1.6 | NADH         |                   |          |    |
| <b>30a<sup>T</sup></b> |                             | 2.8 ± 0.8   |                               | 1.6 ± 0.2   |                                         | 1.9 ± 0.1   | <b>1B</b>              | n.d       | Lysosome     | 187               |          |    |
| <b>30b<sup>T</sup></b> |                             | 23.0 ± 0.7  |                               | 7.3 ± 1.6   |                                         | 7.0 ± 1.5   | Migration inhibition.  |           |              |                   |          |    |



|                         |                               |                               |      |                                         |                        |                                       |                                        |                  |          |     |
|-------------------------|-------------------------------|-------------------------------|------|-----------------------------------------|------------------------|---------------------------------------|----------------------------------------|------------------|----------|-----|
| <b>30c</b> <sup>T</sup> | A549                          | 7.4 ± 0.1                     | HeLa | 2.5 ± 0.1                               | BEAS-2B <sup>(N)</sup> | 1.6 ± 0.5                             | NADH                                   |                  |          |     |
| <b>30d</b> <sup>T</sup> |                               | 39.5 ± 2.7                    |      | 40.6 ± 2.8                              |                        | 45.7 ± 1.4                            |                                        |                  |          |     |
| <b>30e</b> <sup>T</sup> |                               | 3.5 ± 0.1                     |      | 1.3 ± 0.1                               |                        | 1.7 ± 0.2                             |                                        |                  |          |     |
| <b>30f</b> <sup>T</sup> |                               | 13.0 ± 0.5                    |      | 8.6 ± 0.6                               |                        | 11.8 ± 2.4                            |                                        |                  |          |     |
| <b>31a</b> <sup>T</sup> | A549; 23.2 ± 3.6              |                               |      | HeLa; 18.7 ± 2.7                        |                        |                                       | ROS/Raise NF-κB activity.<br><b>2B</b> | S-phase          | Lysosome | 188 |
|                         | HepG2; 19.4 ± 7.5             |                               |      | BEAS-2B <sup>(N)</sup> ; 19.96 ± 0.7    |                        |                                       |                                        |                  |          |     |
| <b>31b</b> <sup>T</sup> | A549; 36.8 ± 1.6              |                               |      | HeLa; 28.2 ± 3.8                        |                        |                                       | Migration inhibition.                  | n.d              |          |     |
|                         | HepG2; 28.7 ± 6.9             |                               |      | BEAS-2B <sup>(N)</sup> ; 30.12 ± 0.3    |                        |                                       |                                        |                  |          |     |
| <b>32a</b> <sup>T</sup> | MCF-7 (MTS); 0.11 ± 0.03      | HCT-116 (MTS); 0.25 ± 0.01    |      | PANC-1 (MTS); 0.60 ± 0.08               |                        | Trx-R inhibition<br>ROS\MMP\apoptosis | n.d                                    | Trx-R inhibition | 155      |     |
|                         | MDA-MB-231 (MTS); 0.22 ± 0.02 | MIA-PaCa-2 (MTS); 0.27 ± 0.01 |      | MRC-5 <sup>(N)</sup> (MTS); 1.16 ± 0.30 |                        |                                       |                                        |                  |          |     |
| <b>32b</b> <sup>T</sup> | MCF-7 (MTS); 0.06 ± 0.02      | HCT-116 (MTS); 0.18 ± 0.07    |      | PANC-1 (MTS); 0.26 ± 0.04               |                        |                                       |                                        |                  |          |     |
|                         | MDA-MB-231 (MTS); 0.14 ± 0.01 | MIA-PaCa-2 (MTS); 0.20 ± 0.01 |      | MRC-5 <sup>(N)</sup> (MTS); 1.33 ± 0.00 |                        |                                       |                                        |                  |          |     |
| <b>32c</b> <sup>T</sup> | MCF-7 (MTS); 0.05 ± 0.01      | HCT-116 (MTS); 0.22 ± 0.01    |      | PANC-1 (MTS); 0.45 ± 0.01               |                        |                                       |                                        |                  |          |     |
|                         | MDA-MB-231 (MTS); 0.23 ± 0.02 | MIA-PaCa-2 (MTS); 0.37 ± 0.03 |      | MRC-5 <sup>(N)</sup> (MTS); 1.90 ± 0.43 |                        |                                       |                                        |                  |          |     |
| <b>32d</b> <sup>T</sup> | MCF-7 (MTS); 0.05 ± 0.01      | HCT-116 (MTS); 0.16 ± 0.00    |      | PANC-1 (MTS); 0.34 ± 0.02               |                        |                                       |                                        |                  |          |     |
|                         | MDA-MB-231 (MTS); 0.29 ± 0.03 | MIA-PaCa-2 (MTS); 0.29 ± 0.03 |      | MRC-5 <sup>(N)</sup> (MTS); 4.59 ± 1.71 |                        |                                       |                                        |                  |          |     |
| <b>32e</b> <sup>T</sup> | MCF-7 (MTS); 0.22 ± 0.00      | HCT-116 (MTS); 0.44 ± 0.10    |      | PANC-1 (MTS); 0.79 ± 0.07               |                        |                                       |                                        |                  |          |     |
|                         | MDA-MB-231 (MTS); 0.44 ± 0.02 | MIA-PaCa-2 (MTS); 0.53 ± 0.02 |      | MRC-5 <sup>(N)</sup> (MTS); 1.52 ± 0.17 |                        |                                       |                                        |                  |          |     |

|                         |                                         |                                         |                                                       |                                           |                           |         |             |     |
|-------------------------|-----------------------------------------|-----------------------------------------|-------------------------------------------------------|-------------------------------------------|---------------------------|---------|-------------|-----|
| <b>32f</b> <sup>T</sup> | MCF-7 (MTS); 0.19 ± 0.02                | HCT-116 (MTS); 0.39 ± 0.10              | PANC-1 (MTS); 0.63 ± 0.01                             |                                           |                           |         |             |     |
|                         | MDA-MB-231 (MTS); 0.55 ± 0.10           | MIA-PaCa-2 (MTS); 0.43 ± 0.01           | MRC-5 <sup>(N)</sup> (MTS); 5.50 ± 0.00               |                                           |                           |         |             |     |
| <b>33a</b> <sup>T</sup> | MCF-7<br>(MTS)                          | 9.30 ± 1.09                             | MRC-5 <sup>(N)</sup><br>(MTS)                         | 15.20 ± 0.59                              | Apoptosis /angiogenesis   | S-phase |             | 176 |
| <b>33b</b> <sup>T</sup> |                                         | 3.34 ± 0.70                             |                                                       | 16.63 ± 0.00                              |                           |         |             |     |
| <b>33c</b> <sup>T</sup> |                                         | 1.85 ± 1.13                             |                                                       | 16.18 ± 0.00                              |                           |         |             |     |
| <b>33d</b> <sup>T</sup> |                                         | 4.42 ± 1.19                             |                                                       | 5.54 ± 0.00                               |                           |         |             |     |
| <b>33e</b> <sup>T</sup> |                                         | 5.05 ± 0.35                             |                                                       | 19.82 ± 0.00                              |                           |         |             |     |
| <b>34</b> <sup>T</sup>  |                                         | 14.90 ± 3.39                            |                                                       | 35.74 ± 5.99                              |                           |         |             |     |
| <b>35a</b> <sup>T</sup> | HT-29; 0.98 ± 0.02                      | A2780 (crystal violet); 1.87 ± 0.04     | 5637 (crystal violet); 5.56 ± 0.25                    | Apoptosis /angiogenesis                   | S-phase                   |         | 191,<br>192 |     |
|                         | A2780cisR (crystal violet); 1.77 ± 0.04 | SISO (crystal violet); 5.49 ± 0.93      | EA.hy926 <sup>(N)</sup> (crystal violet); 2.85 ± 0.10 |                                           |                           |         |             |     |
|                         | T47D (crystal violet); 2.27 ± 0.04      | LCLC (crystal violet); 9.86 ± 1.04      | A427; 3.78 ± 0.41                                     |                                           |                           |         |             |     |
| <b>35b</b>              | HT-29; 9.16 ± 0.98                      |                                         | T47D (crystal violet); 6.67 ± 0.29                    |                                           |                           | n.d     |             |     |
|                         | A2780 (crystal violet); 6.09 ± 0.18     |                                         | A2780cisR (crystal violet); 4.43 ± 0.12               |                                           |                           |         |             |     |
| <b>35c</b>              | HT-29; 2.40 ± 0.07                      |                                         | T47D (crystal violet); 2.34 ± 0.22                    |                                           |                           |         |             |     |
|                         | A2780 (crystal violet); 1.82 ± 0.02     |                                         | A2780cisR (crystal violet); 2.07 ± 0.06               |                                           |                           |         |             |     |
| <b>35d</b> <sup>T</sup> | A2780 (crystal violet); 3.60 ± 0.28     | A2780cisR (crystal violet); 5.65 ± 0.78 | 5637 (crystal violet); 9.37 ± 0.53                    | A427 (crystal violet); 7.25 ± 0.28        | Apoptosis<br>angiogenesis |         | 192         |     |
|                         | LCLC (crystal violet);                  | SISO (crystal violet);                  | HT-29; 8.68 ± 0.92                                    | EA.hy926 <sup>(N)</sup> (crystal violet); |                           |         |             |     |

|                         |                       |                        |                    |                                       |                           |     |  |     |
|-------------------------|-----------------------|------------------------|--------------------|---------------------------------------|---------------------------|-----|--|-----|
|                         | violet); 15.14 ± 0.49 | 13.87 ± 0.17           |                    | violet); >8                           |                           |     |  |     |
| <b>35e</b> <sup>T</sup> | A2780; 2.31 ± 0.39    | A2780cisR; 3.37 ± 0.41 | 5637; 2.95 ± 0.71  | A427; 4.28 ± 0.55                     | Angiogenesis              |     |  |     |
|                         | LCLC; 5.58 ± 0.33     | SISO; 4.76 ± 0.87      | HT-29; 9.50 ± 0.75 | EA.hy926 <sup>(N)</sup> ; 2.99 ± 0.09 |                           |     |  |     |
| <b>35f</b> <sup>T</sup> | A2780; 2.70 ± 0.13    | A2780cisR; 1.93 ± 0.15 | 5637; 2.45 ± 0.10  | A427; 2.62 ± 0.56                     | Apoptosis<br>angiogenesis |     |  |     |
|                         | LCLC; 6.63 ± 0.88     | SISO; 6.65 ± 0.04      | HT-29; 3.77 ± 0.31 | EA.hy926 <sup>(N)</sup> ; 5.22 ± 0.88 |                           |     |  |     |
| <b>35g</b> <sup>T</sup> | A2780; 2.78 ± 0.12    | A2780cisR; 1.70 ± 0.38 | 5637; 3.70 ± 0.09  | A427; 2.35 ± 0.62                     | ROS<br>angiogenesis       |     |  |     |
|                         | LCLC; 5.10 ± 0.33     | SISO; 3.42 ± 0.26      | HT-29; 6.27 ± 0.69 | EA.hy926 <sup>(N)</sup> ; 1.19 ± 0.05 |                           |     |  |     |
| <b>35h</b> <sup>T</sup> | A2780; 2.29 ± 0.46    | A2780cisR; 3.76 ± 0.64 | 5637; 5.15 ± 0.12  | A427; 2.34 ± 0.06                     |                           |     |  |     |
|                         | LCLC; 3.47 ± 0.13     | SISO; 3.61 ± 0.93      | HT-29; 5.73 ± 0.43 | EA.hy926 <sup>(N)</sup> ; 1.98 ± 0.40 |                           |     |  |     |
| <b>35i</b> <sup>T</sup> | A2780; 1.22 ± 0.41    | A2780cisR; 1.21 ± 0.48 | 5637; 1.48 ± 0.88  | A427; 1.59 ± 0.34                     | Angiogenesis              |     |  |     |
|                         | LCLC; 3.61 ± 0.21     | SISO; 3.79 ± 0.31      | HT-29; 4.01 ± 0.56 | EA.hy926 <sup>(N)</sup> ; 5.95 ± 0.92 |                           |     |  |     |
| <b>36a</b> <sup>*</sup> |                       | > 100                  |                    | > 100                                 |                           | n.d |  | 193 |
| <b>36b</b> <sup>*</sup> |                       | 55.7 ± 3.3             |                    | > 100                                 |                           |     |  |     |
| <b>36c</b> <sup>*</sup> |                       | 42.8 ± 2.3             |                    | > 100                                 |                           |     |  |     |

|                        |            |             |                        |            |                   |     |     |          |
|------------------------|------------|-------------|------------------------|------------|-------------------|-----|-----|----------|
| <b>36d<sup>T</sup></b> | A549       | 19.6 ± 1.3  | BEAS-2B <sup>(N)</sup> | 35.1 ± 2.1 |                   |     |     |          |
| <b>36e<sup>T</sup></b> |            | 51.0 ± 5.2  |                        | 32.6 ± 1.4 |                   |     |     |          |
| <b>36f<sup>T</sup></b> |            | 11.9 ± 0.8  |                        | 8.6 ± 0.1  |                   |     |     |          |
| <b>36g<sup>T</sup></b> |            | 7.9 ± 0.4   |                        | 5.7 ± 0.5  |                   |     |     |          |
| <b>36h<sup>T</sup></b> |            | 6.6 ± 1.7   |                        | 4.9 ± 0.1  |                   |     |     |          |
| <b>37a</b>             | A549       | > 100       |                        | NADH       | n.d               |     | 137 |          |
| <b>37b</b>             |            | > 100       |                        |            |                   |     |     |          |
| <b>37c</b>             |            | 25.86 ± 1.2 |                        |            |                   |     |     |          |
| <b>37d</b>             |            | 14.05 ± 0.1 |                        | <b>1B</b>  | G <sub>2</sub> /M |     |     |          |
| <b>37e</b>             |            | 9.15 ± 0.2  |                        |            | n.d               |     |     |          |
| <b>37f</b>             |            | 3.04 ± 0.5  |                        |            |                   |     |     |          |
| <b>37g</b>             |            | 2.21 ± 0.2  |                        |            |                   |     |     |          |
| <b>37h</b>             |            | 1.99 ± 0.1  |                        | <b>1B</b>  | G <sub>2</sub> /M |     |     | Lysosome |
| <b>37i</b>             |            | 3.94 ± 0.3  |                        |            | n.d               |     |     |          |
| <b>37j</b>             |            | 3.64 ± 0.3  |                        | NADH       |                   |     |     |          |
| <b>37k</b>             |            | > 100       |                        |            |                   |     |     |          |
| <b>37l</b>             | 7.44 ± 0.3 |             |                        |            |                   |     |     |          |
| <b>37m<sup>T</sup></b> | A549       | 4.21 ± 0.3  | BEAS-2B <sup>(N)</sup> | 3.58 ± 0.3 | NADH/ROS          | n.d |     | 194      |
| <b>37n<sup>T</sup></b> |            | 3.25 ± 0.2  |                        | 2.03 ± 0.2 |                   |     |     |          |
| <b>37o<sup>T</sup></b> |            | 1.84 ± 0.1  |                        | 0.60 ± 0.3 |                   |     |     |          |
| <b>37p<sup>T</sup></b> |            | 4.39 ± 0.1  |                        | 3.43 ± 0.1 |                   |     |     |          |

|                        |                         |             |                                        |            |                    |                                |                                          |             |
|------------------------|-------------------------|-------------|----------------------------------------|------------|--------------------|--------------------------------|------------------------------------------|-------------|
| <b>37<sup>T</sup></b>  |                         | 2.67 ± 0.1  |                                        | 1.21 ± 0.3 |                    |                                |                                          |             |
| <b>37r<sup>T</sup></b> |                         | 0.85 ± 0.2  |                                        | 4.60 ± 0.5 | <b>1B</b>          | G <sub>0</sub> /G <sub>1</sub> | Lysosome                                 |             |
| <b>38a</b>             | A549                    | 18.2 ± 0.1  |                                        |            |                    | n.d                            |                                          | 195         |
| <b>38b</b>             |                         | 15.6 ± 2.0  |                                        |            |                    |                                |                                          |             |
| <b>38c</b>             |                         | 12.3 ± 2.3  |                                        |            |                    |                                |                                          |             |
| <b>38d</b>             |                         | 8.9 ± 0.1   |                                        |            |                    |                                |                                          |             |
| <b>38e</b>             |                         | 6.7 ± 0.7   |                                        |            |                    |                                |                                          |             |
| <b>38f</b>             |                         | 5.9 ± 0.2   |                                        |            |                    | <b>1B</b>                      | Sub-G <sub>1</sub> and G <sub>2</sub> /M |             |
| <b>39a<sup>T</sup></b> | MDA-MB-231; 3.33 ± 0.09 |             | MDA-MB-468; 0.95 ± 0.03                |            |                    |                                |                                          | 196,<br>197 |
|                        | HCT-116; 3.47 ± 0.11    |             | HEK-293T <sup>(N)</sup> ; 23.95 ± 0.28 |            |                    |                                |                                          |             |
| <b>39b<sup>T</sup></b> | MDA-MB-231; 1.19 ± 0.05 |             | MDA-MB-468; 0.52 ± 0.02                |            | <b>2A</b>          | G <sub>2</sub> /M              | Mitochondria                             |             |
|                        | HCT-116; 1.36 ± 0.01    |             | HEK-293T <sup>(N)</sup> ; 18.57 ± 0.05 |            |                    |                                |                                          |             |
| <b>39c<sup>T</sup></b> | MDA-MB-231; 2.77 ± 0.06 |             | MDA-MB-468; 0.75 ± 0.06                |            |                    |                                |                                          |             |
|                        | HCT-116; 1.59 ± 0.04    |             | HEK-293T <sup>(N)</sup> ; 22.92 ± 0.02 |            |                    |                                |                                          |             |
| <b>39d<sup>T</sup></b> | MDA-MB-231; 1.19 ± 0.05 |             | MDA-MB-468; 0.52 ± 0.02                |            |                    |                                |                                          |             |
|                        | HCT-116; 5.4 ± 0.09     |             | HEK-293T <sup>(N)</sup> ; 17.23 ± 0.12 |            |                    |                                |                                          |             |
| <b>40a</b>             | HeLa                    | 4.17 ± 0.11 |                                        |            | NADH/ROS/Apoptosis | n.d                            |                                          | 198         |
| <b>40b</b>             |                         | 4.05 ± 0.47 |                                        |            |                    |                                |                                          |             |
| <b>40c</b>             |                         | 3.56 ± 0.68 |                                        |            |                    |                                |                                          |             |
| <b>40d</b>             |                         | 3.73 ± 0.99 |                                        |            |                    |                                |                                          |             |
| <b>40e</b>             |                         | 4.47 ± 0.29 |                                        |            |                    |                                |                                          |             |
| <b>40f</b>             |                         | 5.81 ± 0.61 |                                        |            |                    |                                |                                          |             |

|                       |                            |                                  |                                                     |     |                               |     |                           |
|-----------------------|----------------------------|----------------------------------|-----------------------------------------------------|-----|-------------------------------|-----|---------------------------|
| <b>40g</b>            |                            | 3.46 ± 0.29                      |                                                     |     |                               |     |                           |
| <b>40h</b>            |                            | 3.06 ± 0.38                      |                                                     |     |                               |     |                           |
| <b>40i</b>            |                            | 3.35 ± 0.24                      |                                                     |     |                               |     |                           |
| <b>40j</b>            |                            | 3.36 ± 0.57                      |                                                     |     |                               |     |                           |
| <b>41</b>             | HeLa; 8.6 ± 1.0            | hTERT-RPE1; 11.1 ± 0.7           | ER-stress and disrupts Golgi structure              | n.d | Mitochondria and Lysosome     | 199 |                           |
| <b>42<sup>T</sup></b> | MT4 (MTS); 32              | A549 (MTS); 6                    | Interacts with the guanosine nucleoside of the DNA. | n.d | DNA interaction               | 200 |                           |
|                       | HeLa (MTS); 54             | HEK-293 <sup>(N)</sup> (MTS); 15 |                                                     |     |                               |     |                           |
| <b>43a</b>            | NCI-H460 (SRB 72h); 21 ± 6 | HCT-116 (SRB 72h); 36 ± 1        |                                                     | n.d | Nuclear DNA is not the target | 201 |                           |
|                       | SiHa (SRB 72h); 12 ± 2     | SW480 (SRB 72h); 70 ± 19         |                                                     |     |                               |     |                           |
| <b>43b</b>            | NCI-H460; 10 ± 1           | HCT-116; 17 ± 2                  |                                                     |     | Cytoplasm                     |     |                           |
|                       | SiHa; 13 ± 1               | SW480; 26 ± 4                    |                                                     |     |                               |     |                           |
| <b>44a</b>            | HeLa                       | n.d                              | Apoptosis                                           | n.d |                               | 139 |                           |
| <b>44b</b>            |                            | n.d                              |                                                     |     |                               |     |                           |
| <b>44c</b>            |                            | n.d                              |                                                     |     |                               |     |                           |
| <b>44d</b>            |                            | 28.52 ± 8.56                     |                                                     |     |                               |     |                           |
| <b>45a</b>            |                            | 7.33 ± 0.28                      |                                                     |     |                               |     | G <sub>2</sub> -phase     |
| <b>45b</b>            |                            | 17.52 ± 0.64                     |                                                     |     |                               |     | n.d                       |
| <b>45c</b>            |                            | 45.02 ± 3.07                     |                                                     |     |                               |     |                           |
| <b>45d</b>            |                            | n.d                              |                                                     |     |                               |     |                           |
| <b>45e</b>            |                            | 2.01 ± 0.28                      |                                                     |     |                               |     | G <sub>2</sub> , S-phases |

|                                             |                |                  |            |                        |               |                     |                                |           |  |     |     |
|---------------------------------------------|----------------|------------------|------------|------------------------|---------------|---------------------|--------------------------------|-----------|--|-----|-----|
| <b>46a</b>                                  | A549           | < 20             |            |                        | ROS/Apoptosis | G <sub>2</sub> /M   | 16                             |           |  |     |     |
| <b>46b</b>                                  |                | < 30             |            |                        |               | n.d                 |                                |           |  |     |     |
| <b>46c</b>                                  |                | > 30             |            |                        |               |                     |                                |           |  |     |     |
| <b>47a</b>                                  | K562           | 1.10             |            |                        |               | n.d                 | 115                            |           |  |     |     |
| <b>47b</b>                                  |                | 0.73             |            |                        |               |                     |                                |           |  |     |     |
| <b>47c</b>                                  | K562; 0.26     | MCF-7; 5.52      | A549; 2.09 |                        | <b>2A</b>     | Sub-G <sub>1</sub>  | Mitochondria                   |           |  |     |     |
|                                             | K562/A02; 1.95 | MCF-7/ADM; 18.81 |            |                        |               |                     |                                |           |  |     |     |
| <b>47d</b>                                  | K562           | 0.95             |            |                        |               | n.d                 |                                |           |  |     |     |
| <b>47e</b>                                  |                | 0.67             |            |                        |               |                     |                                |           |  |     |     |
| <b>47f</b>                                  |                | 1.06             |            |                        |               |                     |                                |           |  |     |     |
| <b>47g</b>                                  |                | 0.53             |            |                        |               |                     |                                |           |  |     |     |
| <b>47h</b>                                  |                | 1.00             |            |                        |               |                     |                                |           |  |     |     |
| <b>47i</b>                                  |                | 0.62             |            |                        |               |                     |                                |           |  |     |     |
| <b>47j</b>                                  |                | 0.94             |            |                        |               |                     |                                |           |  |     |     |
| <b>47k</b>                                  |                | 4.77             |            |                        |               |                     |                                |           |  |     |     |
| <b>47l</b>                                  |                | 1.13             |            |                        |               |                     |                                |           |  |     |     |
| <b>47m</b>                                  |                | 0.61             |            |                        |               |                     |                                |           |  |     |     |
| <b>47n</b>                                  |                | 1.20             |            |                        |               |                     |                                |           |  |     |     |
| <b>47o</b>                                  |                | 0.87             |            |                        |               |                     |                                |           |  |     |     |
| <b>3.2.3. Bidentate ligands C^N ligands</b> |                |                  |            |                        |               |                     |                                |           |  |     |     |
| <b>48a</b>                                  |                |                  | 20.8 ± 2.2 |                        |               |                     |                                | 6.7 ± 0.2 |  | n.d | 114 |
| <b>48b<sup>T</sup></b>                      |                | 16.7 ± 2.2       | 5.6 ± 0.2  | BEAS-2B <sup>(N)</sup> | 2.5 ± 0.2     | NADH//MMP/Apoptosis | G <sub>0</sub> /G <sub>1</sub> |           |  |     |     |

|                        |                  |                  |                                  |                                    |                        |                     |                   |          |                                |
|------------------------|------------------|------------------|----------------------------------|------------------------------------|------------------------|---------------------|-------------------|----------|--------------------------------|
| <b>48c</b>             | A549             | 16.5 ± 0.8       | HeLa                             | 5.9 ± 0.1                          |                        |                     | n.d               | Lysosome |                                |
| <b>48d</b>             |                  | 13.7 ± 1.3       |                                  | 6.4 ± 0.4                          |                        | NADH//MMP/Apoptosis |                   |          |                                |
| <b>48e</b>             |                  | 8.5 ± 0.9        |                                  | 4.0 ± 0.7                          |                        | NADH//MMP/Apoptosis |                   |          |                                |
| <b>48f<sup>T</sup></b> |                  | 3.9 ± 0.1        |                                  | 3.1 ± 0.1                          | BEAS-2B <sup>(N)</sup> | 3.2 ± 0.1           |                   |          | <b>1B</b>                      |
| <b>48g</b>             |                  | 5.3 ± 0.9        |                                  | 3.5 ± 0.2                          |                        |                     |                   |          |                                |
| <b>48h</b>             |                  | 5.4 ± 0.4        |                                  | 3.6 ± 0.4                          |                        |                     |                   |          |                                |
| <b>48i</b>             |                  | 3.0 ± 0.2        |                                  | 3.0 ± 0.2                          |                        |                     |                   |          |                                |
| <b>48j</b>             |                  | 2.5 ± 0.6        |                                  | 2.6 ± 0.2                          |                        |                     |                   |          |                                |
| <b>48k</b>             |                  | 2.6 ± 0.1        |                                  | 2.4 ± 0.1                          |                        |                     |                   |          |                                |
| <b>48l</b>             |                  | 3.3 ± 0.5        |                                  | 2.2 ± 0.5                          |                        | <b>2A</b>           |                   |          | G <sub>0</sub> /G <sub>1</sub> |
| <b>49a<sup>T</sup></b> | A549; 5.0 ± 0.6  | CT26; 5.4 ± 0.8  | GL261; 9.1 ± 1.5                 | HCT-116; 6.8 ± 0.3                 | HeLa; 4.7 ± 0.2        |                     | n.d               | 125      |                                |
|                        | HepG2; 5.7 ± 0.5 | HT-29; 6.3 ± 0.9 | 16HBE <sup>(N)</sup> ; 6.9 ± 0.5 | BEAS-2B <sup>(N)</sup> ; 7.4 ± 0.8 |                        |                     |                   |          |                                |
| <b>49b<sup>T</sup></b> | A549; 3.7 ± 0.5  | CT26; 4.0 ± 0.1  | GL261; 7.4 ± 0.7                 | HCT-116; 5.2 ± 0.5                 | HeLa; 3.9 ± 0.7        | <b>2B</b>           | G <sub>2</sub> /M | Lysosome |                                |
|                        | HepG2; 4.3 ± 0.2 | HT-29; 5.0 ± 0.5 | 16HBE <sup>(N)</sup> ; 5.4 ± 0.9 | BEAS-2B <sup>(N)</sup> ; 5.8 ± 0.2 |                        |                     |                   |          |                                |
| <b>49c<sup>T</sup></b> | A549; 3.8 ± 0.2  | CT26; 4.3 ± 0.3  | GL261; 8.1 ± 0.4                 | HCT-116; 5.1 ± 0.9                 | HeLa; 4.2 ± 0.5        |                     | n.d               |          |                                |
|                        | HepG2; 4.7 ± 0.6 | HT-29; 5.3 ± 0.3 | 16HBE <sup>(N)</sup> ; 6.3 ± 0.6 | BEAS-2B <sup>(N)</sup> ; 7.4 ± 0.8 |                        |                     |                   |          |                                |
| <b>49d<sup>T</sup></b> | A549; 4.0 ± 0.7  | CT26; 4.6 ± 0.5  | GL261; 7.7 ±                     | HCT-116; 5.9 ±                     | HeLa; 4.0 ±            |                     |                   |          |                                |



|  |                  |                  |                                  |                                    |     |  |  |  |  |
|--|------------------|------------------|----------------------------------|------------------------------------|-----|--|--|--|--|
|  |                  |                  | 0.6                              | 0.1                                | 0.8 |  |  |  |  |
|  | HepG2; 4.4 ± 0.4 | HT-29; 4.8 ± 0.7 | 16HBE <sup>(N)</sup> ; 6.5 ± 0.4 | BEAS-2B <sup>(N)</sup> ; 7.9 ± 0.7 |     |  |  |  |  |

<sup>1</sup> IC<sub>50</sub> is defined as the concentration of drug required to inhibit cell growth by 50% compared to the control. Each value represents the mean ± standard deviation from two or three independent experiments.

<sup>2</sup> Cell viability was determined by the MTT assay, other than this is mentioned.

T: The complex was examined against normal cell line; \*: The complex was safe to the tested normal cell with IC<sub>50</sub> > 100 μM; N: Normal cell line; n.d: not determined.

Mechanism of action according to Fig. 3 (within the main text): **1A** pathway: NADH/ROS/MMP/Apoptosis. **1B** pathway: NADH/ROS/LMP/Apoptosis. **1AB** pathway: NADH/ROS/MMP/LMP/Apoptosis. **2A** pathway: ROS/MMP/Apoptosis.

**Full names and Abbreviations of Cell lines:** 16HBE, human bronchial epithelial cell lines; 518A2, human melanoma cell line; 5637, human bladder cancer cells; 8505C, human thyroid carcinoma; ARPE-19, human retinal epithelial cells; A253, human submandibular gland carcinoma; A2780, human ovarian carcinoma cell lines; A2780R/A2780cisR; Cisplatin resistant human ovarian; A427, human lung carcinoma cells; A549, Human lung carcinoma cell line; A549R, cisplatin resistant human lung carcinoma cell line; BEAS-2B, human non-tumorigenic lung epithelial cell line; BEL-7402, human hepatoma cell line; BHK21, normal healthy kidney cells; Caco-2, human colon carcinoma cell lines; Capan2, pancreatic adenocarcinoma cell line; CH1/PA-1, ovarian teratocarcinoma cell lines; CHO, normal Chinese hamster ovarian cells; CHO-K1, Chinese Hamster Ovary-K1 Cells; CNS cancer, Central nervous system cancer; Colo-829, human, umbilical metastasis, melanoma; CRL-2115, human skin fibroblast adherent; CT26, mouse colon carcinoma; DL, Dalton's ascites lymphoma; DLD-1, human colorectal adenocarcinoma cells; DU-145, human prostatic carcinoma; EA.hy926, human umbilical vein endothelial cell line; HaCaT, human keratinocyte cell line; HCT-116, colon cancer cell line; HCT-116 p53<sup>-/-</sup>, colon cancer cell line depleted p53; HEK-293T, human embryonic kidney cell lines; HeLa, cervical cancer cell line; HepG2, human liver cancer cell line; HFF-1, human skin cell lines; HL-60, human leukaemia; HT29, human colorectal adenocarcinoma cells; KMST-6, human skin fibroblast cell line; LCLC-103H, human lung carcinoma cells; LoVo, colorectal adenoma; LO2, human normal liver; MCF-7, human breast cancer cell line; MCF-10, human breast cancer cell lines; MDA-MD-435S, human breast cancer cell lines; MDB-MA-231, human breast cancer cell line; MES-OV, ovarian cancer cells; MIA PaCa-2, pancreatic carcinoma cell lines; MRC-5, human fetal lung fibroblast cells; OVCAR-3, ovarian adenocarcinoma cell line; Panc-1, pancreatic ductular adenocarcinoma cell line; PC3, human prostatic carcinoma; PNT2, normal prostate cell line; Saos, osteosarcoma cell line; SiHa, cervical cancer cell line; SISO, human uterine cervical adenocarcinoma cells; SKOV-3, human ovarian cancer cell line; SW620, human colon cell lines; U87, human glioblastoma cell lines; WHCO1, esophageal cancer cell line; WI-38, human fetal lung fibroblast cells.
