# Supplementary material for: A comprehensive survey of cytotoxic active half-sandwich Ir(iii) complexes: structural perspective, and mechanism of action
Source: Royal Society of Chemistry journal article supplement (doi:10.1039/d4dt03219e), 2025-01-01
Supplement: d4dt03219e2.pdf [file d4dt03219e2.pdf]

**Table S2** IC<sub>50</sub> values of **50–125** against cancer and normal cell lines, at different incubation time, mechanism of action, target and cell cycle arrest.

| Complex Number                                                                   | Cell line/IC <sub>50</sub> (μM) <sup>1,2</sup> |              |            |                        | Mechanism of action | Cell Cycle arrest    | Target                                     | Ref.                          |                        |
|----------------------------------------------------------------------------------|------------------------------------------------|--------------|------------|------------------------|---------------------|----------------------|--------------------------------------------|-------------------------------|------------------------|
| <b>3.2.4.1. N^N (2,2'-bipyridine, 1,10-phenanthroline and aliphatic diamine)</b> |                                                |              |            |                        |                     |                      |                                            |                               |                        |
| 50a                                                                              | A2780 (SRB)                                    | > 100        |            |                        |                     |                      | n.d                                        | n.d                           | 24, 176                |
| 50b                                                                              |                                                | 15.86 ± 1.49 |            |                        |                     |                      |                                            |                               | 24, 28                 |
| 50c                                                                              | A549                                           | 14.7 ± 0.4   |            |                        |                     | 1A                   | n.d                                        | Mitochondria                  | 24, 28, 179            |
| 50d                                                                              |                                                | 12.5 ± 0.2   |            |                        |                     | NADH                 |                                            |                               | 28, 207                |
| 50e                                                                              |                                                | 16.2 ± 0.5   |            |                        |                     |                      | 1A                                         | S-phase and G <sub>2</sub> /M | Mitochondria           |
| 50f                                                                              |                                                | 11.3 ± 1.0   |            |                        |                     | NADH/MMP             |                                            |                               |                        |
| 50g                                                                              |                                                | 12.0 ± 0.9   |            |                        |                     |                      | NADH                                       | n.d                           |                        |
| 50h                                                                              |                                                | > 100        |            |                        |                     | NADH                 |                                            |                               |                        |
| 50i                                                                              |                                                | > 100        |            |                        |                     |                      | NADH/ROS                                   | G <sub>1</sub>                | Doesn't target the DNA |
| 50j <sup>T</sup>                                                                 |                                                | A549         | 30.7 ± 1.4 | BEAS-2B <sup>(N)</sup> | 70.3 ± 1.9          | 16HBE <sup>(N)</sup> |                                            |                               |                        |
| 50k <sup>T</sup>                                                                 | 35.2 ± 1.4                                     |              | 28.1 ± 3.1 |                        | 19.6 ± 1.4          |                      |                                            |                               |                        |
| 50l <sup>T</sup>                                                                 | 14.9 ± 0.3                                     |              | 14.7 ± 1.3 |                        | 26.6 ± 1.2          |                      |                                            |                               |                        |
| 50m <sup>T</sup>                                                                 | 14.3 ± 1.2                                     |              | 14.3 ± 1.3 |                        | 16.7 ± 1.7          |                      |                                            |                               |                        |
| 50n <sup>T</sup>                                                                 | 11.3 ± 0.9                                     |              | 5.0 ± 0.4  |                        | 3.9 ± 0.1           |                      |                                            |                               |                        |
| 50o <sup>T</sup>                                                                 | 7.3 ± 1.2                                      |              | 21.7 ± 2.3 |                        | 43.0 ± 3.7          |                      | sub-G <sub>1</sub> & G <sub>2</sub> /M and | 22, 116                       |                        |
| 50p                                                                              | MCF-7                                          | 22.9 ± 2.0   |            | HT-29                  | 10.5 ± 0.7          |                      | n.d                                        |                               | 22                     |
| 50q                                                                              |                                                | > 250        |            |                        | > 250               |                      |                                            |                               |                        |
| 50r                                                                              |                                                | 2.3 ± 0.3    |            |                        | 2.0 ± 0.4           |                      |                                            |                               |                        |
| 50s                                                                              |                                                | > 250        |            |                        | > 250               |                      |                                            |                               |                        |
| 50t                                                                              |                                                | 184.5 ± 16.0 |            |                        | > 250               |                      |                                            |                               |                        |
| 50u                                                                              |                                                | > 250        |            |                        | > 250               |                      |                                            |                               |                        |
| 51a                                                                              | A2780 (SRB)                                    | > 100        |            |                        |                     |                      | n.d                                        | DNA                           | 24, 176                |
| 51b                                                                              |                                                | 6.70 ± 0.62  |            |                        |                     |                      |                                            |                               | 24                     |

|                         |                                         |                  |                              |                                       |                                                |           |                               |                                        |                                        |                           |                         |
|-------------------------|-----------------------------------------|------------------|------------------------------|---------------------------------------|------------------------------------------------|-----------|-------------------------------|----------------------------------------|----------------------------------------|---------------------------|-------------------------|
| <b>51c</b> <sup>T</sup> | A2780 (SRB); 0.22 ± 0.03                |                  |                              | MCF-7 (SRB); 0.84 ± 0.08              |                                                |           | <b>1A or 2A</b><br>DNA Damage | G <sub>0</sub> /G <sub>1</sub>         | DNA/<br>Mitochondria                   | 24, 29,<br>205            |                         |
|                         | A2780cisR (SRB); 0.42 ± 0.03            |                  |                              | HL-60 (SRB); 0.28 ± 0.05              |                                                |           |                               |                                        |                                        |                           |                         |
|                         | CHO-K1 <sup>(N)</sup> (SRB); 12.0 ± 0.3 |                  |                              | HSF <sup>(N)</sup> (SRB); 5.48 ± 0.37 |                                                |           |                               |                                        |                                        |                           |                         |
| <b>51d</b> <sup>T</sup> | MCF-7<br>(crystal<br>violet)            | 63.2             | HT-29<br>(crystal<br>violet) | 56.0                                  | HEK-293T <sup>(N)</sup><br>(crystal<br>violet) | 50.7      |                               | n.d                                    |                                        | 204                       |                         |
| <b>51e</b> <sup>T</sup> |                                         | 33.9             |                              | 19.0                                  |                                                | 51.6      |                               |                                        |                                        |                           |                         |
| <b>51f</b> <sup>T</sup> |                                         | 29.9             |                              | 28.5                                  |                                                | 15.7      |                               |                                        |                                        |                           |                         |
| <b>51g</b>              | A549                                    |                  | > 100                        | BEAS-2B <sup>(N)</sup>                |                                                | n.d       |                               | n.d                                    |                                        | 29                        |                         |
| <b>51h</b>              |                                         |                  | > 100                        |                                       |                                                | n.d       |                               |                                        |                                        |                           |                         |
| <b>51i</b>              |                                         |                  | > 100                        |                                       |                                                | n.d       |                               |                                        |                                        |                           |                         |
| <b>51j</b>              |                                         |                  | > 100                        |                                       |                                                | n.d       |                               |                                        |                                        |                           |                         |
| <b>51k</b>              |                                         |                  | 16.9 ± 0.2                   |                                       |                                                | n.d       |                               |                                        |                                        |                           |                         |
| <b>51l</b>              |                                         |                  | 25.3 ± 0.1                   |                                       |                                                | n.d       |                               |                                        |                                        |                           |                         |
| <b>51m</b> <sup>T</sup> |                                         |                  | 4.4 ± 1.2                    |                                       |                                                | 6.3 ± 0.8 |                               |                                        |                                        |                           | <b>1B</b>               |
| <b>51n</b> <sup>*</sup> | A2780; 15.8 ± 1.8                       |                  | A2780cisR; 13.0 ± 1.4        |                                       | MRC-5 <sup>(N)</sup> ; 124.1 ± 16.7            |           | MMP\ROS<br>HDAC inhibition    | S-phase                                | Mitochondria                           | 206                       |                         |
| <b>52</b>               | A2780 (MTS); 1.83 ± 0.04                |                  |                              | OVCAR-3 (MTS); 1.92 ± 0.03            |                                                |           | DNA<br>damage/Apoptosis       | n.d                                    | Late endosomes<br>and lysosomes<br>DNA | 207                       |                         |
|                         | A2780cisR (MTS); 1.35 ± 0.08            |                  |                              | SKOV-3 (MTS); 5.41 ± 0.22             |                                                |           |                               |                                        |                                        |                           |                         |
| <b>53a</b>              | A2780<br>(SRB)                          |                  | 49.5                         |                                       |                                                | n.d       | n.d                           | No interaction<br>with<br>nucleobases. | 208                                    |                           |                         |
| <b>53b</b>              |                                         |                  | 48.4                         |                                       |                                                |           |                               |                                        |                                        |                           |                         |
| <b>53c</b>              |                                         |                  | 0.98                         |                                       |                                                |           |                               |                                        |                                        |                           |                         |
| <b>53d</b>              |                                         |                  | 0.61                         |                                       |                                                |           |                               |                                        |                                        | Convert GSH into<br>GSSG. |                         |
| <b>54a</b> <sup>*</sup> | HeLa<br>(48h)                           | 11.60 ± 1.6      | Caco-2<br>(72h)              | 4.43 ± 0.52                           | HEK-293T <sup>(N)</sup>                        | > 100     | n.d                           | n.d                                    | Mitochondria                           | 209                       |                         |
| <b>54b</b> <sup>*</sup> |                                         | 30.61 ± 1.5      |                              | 11.52 ± 0.54                          |                                                | > 100     |                               |                                        |                                        |                           |                         |
| <b>54c</b> <sup>*</sup> |                                         | 27.57 ± 2.0      |                              | 6.05 ± 0.77                           |                                                | > 100     |                               |                                        |                                        |                           | Mitochondrial<br>damage |
| <b>54d</b> <sup>*</sup> |                                         | 12.72 ± 1.01     |                              | 7.28 ± 0.37                           |                                                | > 100     |                               |                                        |                                        |                           | n.d                     |
| <b>54e</b> <sup>*</sup> |                                         | 2.47 ± 0.68      |                              | 9.85 ± 0.44                           |                                                | > 100     |                               |                                        |                                        |                           | Mitochondrial<br>damage |
| <b>54f</b> <sup>*</sup> |                                         | 1.70 ± 0.49      |                              | 4.72 ± 0.95                           |                                                | > 100     |                               |                                        |                                        |                           | n.d                     |
| <b>54g</b> <sup>*</sup> |                                         | 113.22 ±<br>2.30 |                              | 4.28 ± 0.32                           |                                                | > 100     |                               |                                        |                                        |                           |                         |
| <b>54o</b>              | HCT-116; 4.14 ± 1.2                     |                  |                              | HEK-293T <sup>(N)</sup> ; > 100       |                                                |           | <b>2A</b> / inhibitor of      | G <sub>0</sub> /G <sub>1</sub>         | Mitochondria\                          | 210                       |                         |

|                        |                                   |                                    |                      |                                                                                |                                                              |                         |              |     |
|------------------------|-----------------------------------|------------------------------------|----------------------|--------------------------------------------------------------------------------|--------------------------------------------------------------|-------------------------|--------------|-----|
|                        |                                   |                                    |                      | autophagy for the eradication of cancer stem cells. Bcl-2 increase /DNA damage |                                                              | DNA                     |              |     |
| <b>54p<sup>T</sup></b> | MDA-MB-468                        | 3.673                              | HaCaT <sup>(N)</sup> | 11.42                                                                          | MMP/ROS                                                      | Sub-G <sub>1</sub>      | Mitochondria | 212 |
| <b>54q</b>             |                                   | 20.35                              |                      | n.d                                                                            |                                                              | n.d                     |              |     |
| <b>54r</b>             |                                   | 20.27                              |                      |                                                                                |                                                              |                         |              |     |
| <b>54s</b>             |                                   | 5.202                              |                      |                                                                                |                                                              |                         |              |     |
| <b>54t</b>             |                                   | 4.412                              |                      |                                                                                |                                                              |                         |              |     |
| <b>55a</b>             | A549                              | 6.8 ± 0.5                          |                      | NADH                                                                           | n.d                                                          | DNA                     | 213          |     |
| <b>55b</b>             |                                   | 1.5 ± 0.1                          |                      |                                                                                |                                                              |                         |              |     |
| <b>55c</b>             |                                   | 3.6 ± 0.5                          |                      | NADH/ROS/Apoptosis                                                             | sub-G <sub>1</sub> , G <sub>1</sub> and S-phase              |                         |              |     |
| <b>55d</b>             |                                   | 4.8 ± 2.1                          |                      | NADH                                                                           | n.d                                                          |                         |              |     |
| <b>55e</b>             |                                   | 1.7 ± 0.2                          |                      |                                                                                |                                                              |                         |              |     |
| <b>55f</b>             |                                   | 7.1 ± 0.8                          |                      | NADH/ROS/Apoptosis                                                             | sub-G <sub>1</sub> , G <sub>2</sub> /M and S-phase           |                         |              |     |
| <b>56a</b>             | A549                              | 36.3 ± 0.6                         |                      | NADH                                                                           | n.d                                                          | Lysosome                | 214          |     |
| <b>56b</b>             |                                   | > 100                              |                      |                                                                                |                                                              |                         |              |     |
| <b>56c</b>             |                                   | > 100                              |                      |                                                                                |                                                              |                         |              |     |
| <b>56d</b>             |                                   | 3.5 ± 0.1                          |                      |                                                                                |                                                              |                         |              |     |
| <b>56e</b>             |                                   | 1.3 ± 0.1                          |                      | ROS                                                                            | Disrupt G <sub>0</sub> /G <sub>1</sub> and G <sub>2</sub> /M |                         |              |     |
| <b>56f</b>             |                                   | 3.7 ± 0.2                          |                      | NADH                                                                           | n.d                                                          |                         |              |     |
| <b>56g</b>             |                                   | 5.7 ± 0.2                          |                      |                                                                                |                                                              |                         |              |     |
| <b>56h</b>             |                                   | 1.2 ± 0.1                          |                      | <b>1B</b>                                                                      | G <sub>2</sub> /M                                            |                         |              |     |
| <b>56i</b>             |                                   | 1.8 ± 0.2                          |                      | NADH                                                                           | n.d                                                          |                         |              |     |
| <b>57a</b>             | A549; 18.3 ± 0.8                  | HeLa; 20.1 ± 2.1                   |                      | MMP/LMP/Apoptosis                                                              | G <sub>0</sub> /G <sub>1</sub>                               | Lysosome / Mitochondria | 189          |     |
|                        | 16HBE <sup>(N)</sup> ; n.d        | BEAS-2B <sup>(N)</sup> ; n.d       |                      |                                                                                |                                                              |                         |              |     |
| <b>57b<sup>T</sup></b> | A549; 4.3 ± 0.2                   | HeLa; 4.2 ± 0.2                    |                      |                                                                                |                                                              |                         |              |     |
|                        | 16HBE <sup>(N)</sup> ; 7.7 ± 0.1  | BEAS-2B <sup>(N)</sup> ; 7.2 ± 0.6 |                      |                                                                                |                                                              |                         |              |     |
| <b>57c<sup>T</sup></b> | A549; 3.8 ± 0.1                   | HeLa; 3.0 ± 0.5                    |                      |                                                                                |                                                              |                         |              |     |
|                        | 16HBE <sup>(N)</sup> ; 10.1 ± 0.2 | BEAS-2B <sup>(N)</sup> ; 4.4 ± 0.5 |                      |                                                                                |                                                              |                         |              |     |

|                         |                                     |             |                                     |             |                        |                            |                    |                               |                            |     |
|-------------------------|-------------------------------------|-------------|-------------------------------------|-------------|------------------------|----------------------------|--------------------|-------------------------------|----------------------------|-----|
|                         |                                     |             |                                     |             |                        |                            |                    |                               | and Doesn't target the DNA |     |
| <b>57d</b> <sup>T</sup> | A549; 12.1 ± 0.3                    |             | HeLa; 7.3 ± 1.4                     |             |                        |                            |                    | n.d                           | Doesn't target the DNA     |     |
|                         | 16HBE <sup>(N)</sup> ; 11.6 ± 1.7   |             | BEAS-2B <sup>(N)</sup> ; 13.5 ± 1.7 |             |                        |                            |                    |                               |                            |     |
| <b>57e</b> <sup>*</sup> | A549; 56.7 ± 8.6                    |             | HeLa; > 100                         |             |                        | n.d                        |                    | n.d                           |                            | 202 |
|                         | HepG2; > 100                        |             | 16HBE <sup>(N)</sup> ; 35.4 ± 0.1   |             |                        |                            |                    |                               |                            |     |
|                         | BEAS-2B <sup>(N)</sup> ; > 100      |             |                                     |             |                        |                            |                    |                               |                            |     |
| <b>57f</b> <sup>T</sup> | A549; 2.6 ± 0.3                     |             | HeLa; 3.6 ± 0.8                     |             |                        | <b>1B</b>                  |                    | No effect                     | Lysosome                   |     |
|                         | HepG2; 5.5 ± 0.7                    |             | 16HBE <sup>(N)</sup> ; 2.6 ± 0.1    |             |                        |                            |                    |                               |                            |     |
|                         | BEAS-2B <sup>(N)</sup> ; 3.0 ± 0.2  |             |                                     |             |                        |                            |                    |                               |                            |     |
| <b>57g</b> <sup>T</sup> | A549; 7.9 ± 0.2                     |             | HeLa; 6.7 ± 1.1                     |             |                        | Apoptosis                  |                    | n.d                           |                            |     |
|                         | HepG2; 9.7 ± 1.7                    |             | 16HBE <sup>(N)</sup> ; 5.0 ± 1.6    |             |                        |                            |                    |                               |                            |     |
|                         | BEAS-2B <sup>(N)</sup> ; 11.7 ± 1.3 |             |                                     |             |                        |                            |                    |                               |                            |     |
| <b>57h</b> <sup>T</sup> | A549; 6.2 ± 0.3                     |             | HeLa; 5.6 ± 0.6                     |             |                        |                            |                    |                               |                            |     |
|                         | HepG2; 8.3 ± 0.1                    |             | 16HBE <sup>(N)</sup> ; 7.4 ± 1.1    |             |                        |                            |                    |                               |                            |     |
|                         | BEAS-2B <sup>(N)</sup> ; 9.2 ± 3.4  |             |                                     |             |                        |                            |                    |                               |                            |     |
| <b>58a</b> <sup>*</sup> | A549; > 100                         |             | HeLa; > 100                         |             |                        | n.d                        |                    | n.d                           |                            | 203 |
|                         | HepG2; > 100                        |             | BEAS-2B <sup>(N)</sup> ; > 100      |             |                        |                            |                    |                               |                            |     |
| <b>58b</b> <sup>T</sup> | A549; 15.6 ± 1.2                    |             | HeLa; 11.3 ± 0.1                    |             |                        | <b>2A</b> /anti-metastasis |                    | G <sub>2</sub> /M and S-phase | Mitochondria               |     |
|                         | HepG2; 11.8 ± 3.6                   |             | BEAS-2B <sup>(N)</sup> ; 14.0 ± 2.1 |             |                        |                            |                    |                               |                            |     |
| <b>58c</b> <sup>T</sup> | A549; 17.0 ± 4.1                    |             | HeLa; 17.1 ± 3.6                    |             |                        | <b>2A</b>                  |                    | n.d                           | Lysosome                   |     |
|                         | HepG2; 4.9 ± 0.7                    |             | BEAS-2B <sup>(N)</sup> ; 16.4 ± 1.4 |             |                        |                            |                    |                               |                            |     |
| <b>59a</b> <sup>T</sup> | A549                                | 3.56 ± 0.5  | 16HBE <sup>(N)</sup>                | 6.61 ± 0.2  | BEAS-2B <sup>(N)</sup> | 6.31 ± 0.9                 | NADH/ROS/Apoptosis | Sub-G <sub>1</sub>            | DNA                        | 215 |
| <b>59b</b> <sup>T</sup> |                                     | 17.27 ± 0.1 |                                     | 35.10 ± 0.7 |                        | 20.52 ± 1.4                |                    |                               |                            |     |
| <b>60</b>               | A549; > 200                         |             | A2780; > 200                        |             |                        |                            |                    | n.d                           |                            | 6   |
|                         | A549R; > 200                        |             | HeLa; > 200                         |             |                        |                            |                    |                               |                            |     |
|                         | MCF-7; > 200                        |             | LO2; > 200                          |             |                        |                            |                    |                               |                            |     |
| <b>61a</b>              | A2780; 2.49                         |             | A549; 22.9                          |             |                        |                            |                    | n.d                           |                            | 216 |
|                         | HCT-116; 19.1                       |             | MCF-7; 17.5                         |             |                        |                            |                    |                               |                            |     |
|                         | PC3; 9.02                           |             |                                     |             |                        |                            |                    |                               |                            |     |
| <b>61b</b>              | A2780; 0.89                         |             | A549; 10.7                          |             |                        |                            |                    |                               |                            |     |
|                         | HCT-116; 49.5                       |             | MCF-7; 7.2                          |             |                        |                            |                    |                               |                            |     |
|                         | PC3; 5.77                           |             |                                     |             |                        |                            |                    |                               |                            |     |
| <b>61c</b>              | A2780; 1.06                         |             | A549; 1.82                          |             |                        |                            |                    |                               |                            |     |
|                         | HCT-116; 2.22                       |             | MCF-7; 1.5                          |             |                        |                            |                    |                               |                            |     |

|                                                                 |                                         |              |                                 |     |                                                                                 |                   |                    |             |               |  |           |     |
|-----------------------------------------------------------------|-----------------------------------------|--------------|---------------------------------|-----|---------------------------------------------------------------------------------|-------------------|--------------------|-------------|---------------|--|-----------|-----|
|                                                                 | PC3; 9.23                               |              |                                 |     |                                                                                 |                   |                    |             |               |  |           |     |
| 62a <sup>T</sup>                                                | A2780; 2.8 ± 0.4                        |              | A2780cisR; 6.4 ± 0.5            |     | COX/GST enzyme inhibition<br>DNA metalation.                                    | n.d               | DNA and GST Enzyme | 217         |               |  |           |     |
|                                                                 | MCF-7; 8.0 ± 0.9                        |              | HeLa; 17.1 ± 0.6                |     |                                                                                 |                   |                    |             |               |  |           |     |
|                                                                 | HEK-293T <sup>(N)</sup> ; 10.3 ± 0.6    |              |                                 |     |                                                                                 |                   |                    |             |               |  |           |     |
| 62b <sup>T</sup>                                                | A2780; 7.0 ± 0.8                        |              | A2780cisR; 8.5 ± 0.5            |     |                                                                                 |                   |                    |             |               |  |           |     |
|                                                                 | MCF-7; 9 ± 1                            |              | HeLa; 24 ± 5                    |     |                                                                                 |                   |                    |             |               |  |           |     |
|                                                                 | HEK-293T <sup>(N)</sup> ; 12.5 ± 0.8    |              |                                 |     |                                                                                 |                   |                    |             |               |  |           |     |
| 62c <sup>*</sup>                                                | A2780; > 100                            |              | A2780cisR; 63 ± 6               |     |                                                                                 |                   |                    |             |               |  |           |     |
|                                                                 | MCF-7; 140 ± 30                         |              | HeLa; 190 ± 9                   |     |                                                                                 |                   |                    |             |               |  |           |     |
|                                                                 | HEK-293T <sup>(N)</sup> ; > 100         |              |                                 |     |                                                                                 |                   |                    |             |               |  |           |     |
| 63 <sup>T</sup>                                                 | A2780; 5.9 ± 0.2                        |              | HLF <sup>(N)</sup> ; 11.9 ± 0.4 |     | ROS/MMP/<br>Autophagy<br>down regulation of<br>MMP2/MMP9<br>proteins/Metastasis | G <sub>2</sub> /M | Mitochondria       | 218         |               |  |           |     |
| 64a                                                             | A2780                                   | > 100        | MCF-7; > 500                    |     | NADH/ROS                                                                        | n.d               |                    | 24, 219     |               |  |           |     |
| 64b                                                             |                                         | 16.97 ± 0.05 |                                 |     |                                                                                 |                   |                    | 24          |               |  |           |     |
| 65a                                                             | MCF-7                                   | > 500        |                                 |     |                                                                                 |                   |                    |             |               |  |           |     |
| 65b                                                             |                                         | > 500        |                                 |     |                                                                                 |                   |                    |             |               |  |           |     |
| 65c                                                             |                                         | > 500        |                                 |     |                                                                                 |                   |                    |             |               |  |           |     |
| 65d                                                             |                                         | 105.2 ± 1.4  |                                 |     |                                                                                 |                   |                    |             |               |  |           |     |
| 66a                                                             |                                         | 394.6 ± 10.8 |                                 |     |                                                                                 |                   |                    |             |               |  |           |     |
| 67                                                              | No Cytotoxic activity could be obtained |              |                                 |     |                                                                                 | n.d               |                    | 220         |               |  |           |     |
| 68a                                                             | A2780 (SRB); 0.40 ± 0.03                |              |                                 |     |                                                                                 | S/G <sub>2</sub>  |                    | 140,<br>222 |               |  |           |     |
| 68b                                                             | A549 (SRB); 1.01 ± 0.08                 |              | CNE2 (SRB); 1.26 ± 0.04         |     |                                                                                 | n.d               |                    | 223         |               |  |           |     |
|                                                                 | A2780 (SRB); 0.25 ± 0.02                |              | A2780cisR (SRB); 0.049 ± 0.001  |     |                                                                                 |                   |                    |             |               |  |           |     |
| 68j                                                             | A549 (SRB); 1.5 ± 0.3                   |              | CNE2 (SRB); 2.3 ± 0.3           |     |                                                                                 |                   |                    |             |               |  |           |     |
|                                                                 | A2780 (SRB); 0.12 ± 0.04                |              | A2780cisR (SRB); 0.114 ± 0.003  |     |                                                                                 |                   |                    |             |               |  |           |     |
| <b>3.2.4.2. Azo-, hydroxylamine and Schiff-base N,N-ligands</b> |                                         |              |                                 |     |                                                                                 |                   |                    |             |               |  |           |     |
| 69a                                                             | DI                                      | 366.2 ± 0.07 |                                 | EAC |                                                                                 |                   |                    |             | 393.11 ± 0.06 |  | Apoptosis | n.d |
| 69b                                                             |                                         | 1.52 ± 0.06  |                                 |     | 2.41 ± 0.09                                                                     |                   |                    |             |               |  |           |     |
| 69c                                                             |                                         | 9.58 ± 0.06  |                                 |     | 7.23 ± 0.09                                                                     |                   |                    |             |               |  |           |     |

|                  |                                  |              |                                    |              |                                                 |                                |                                             |     |
|------------------|----------------------------------|--------------|------------------------------------|--------------|-------------------------------------------------|--------------------------------|---------------------------------------------|-----|
| 69d              |                                  | 7.98 ± 0.06  |                                    | 13.22 ± 0.04 |                                                 |                                |                                             |     |
| 70a              | MCF-7; 5                         |              |                                    |              | Apoptosis                                       | S-phase                        | DNA, Protein and RNA                        | 225 |
| 70b              | A549                             | 5.1 ± 0.3    | HeLa                               | 6.5 ± 0.6    | 1A                                              | n.d                            | Nucleus                                     | 226 |
| 70c              |                                  | 25.7 ± 2.5   |                                    | 28.7 ± 1.2   |                                                 |                                |                                             |     |
| 71a              | HT-29                            | 5.82 ± 2.41  | MIA-PaCa-2                         | 2.87 ± 0.26  |                                                 | n.d                            |                                             | 227 |
| 71b              |                                  | 7.92 ± 1.00  |                                    | 8.35 ± 0.29  |                                                 |                                |                                             |     |
| 71c              |                                  | 10.54 ± 4.73 |                                    | 9.65 ± 1.68  |                                                 |                                |                                             |     |
| 71d              | A549                             | 75.9 ± 0.7   |                                    |              | Interact with nucleobases. NADH/ROS / apoptosis | G <sub>2</sub> /M and S-phases | n.d                                         | 228 |
| 71e              |                                  | 14.4 ± 0.8   |                                    |              |                                                 |                                |                                             |     |
| 71f              |                                  | 11.8 ± 0.3   |                                    |              |                                                 |                                |                                             |     |
| 71g              |                                  | > 100        |                                    |              |                                                 |                                |                                             |     |
| 71h              |                                  | 16.9 ± 0.8   |                                    |              |                                                 |                                |                                             |     |
| 71i              |                                  | 2.7 ± 0.1    |                                    |              |                                                 |                                |                                             |     |
| 72a              | A549; 16.3 ± 2.2                 |              | HeLa; >100                         |              |                                                 | n.d                            | DNA does not appear to be the major target. | 117 |
|                  | 16HBE <sup>(N)</sup> ; n.d       |              | BEAS-2B <sup>(N)</sup> ; n.d       |              |                                                 |                                |                                             |     |
| 72b              | A549; 28.8 ± 0.6                 |              | HeLa; 13.9 ± 0.1                   |              |                                                 |                                |                                             |     |
|                  | 16HBE <sup>(N)</sup> ; n.d       |              | BEAS-2B <sup>(N)</sup> ; n.d       |              |                                                 |                                |                                             |     |
| 72c <sup>T</sup> | A549; 1.4 ± 0.2                  |              | HeLa; 1.3 ± 0.1                    |              | NADH/ROS/Apoptosis                              | S-phase                        |                                             |     |
|                  | 16HBE <sup>(N)</sup> ; 2.6 ± 0.1 |              | BEAS-2B <sup>(N)</sup> ; 1.7 ± 0.1 |              |                                                 |                                |                                             |     |
| 72d              | A549; 26.3 ± 1.0                 |              | HeLa; 38.6 ± 1.6                   |              | NADH                                            | n.d                            |                                             |     |
|                  | 16HBE <sup>(N)</sup> ; n.d       |              | BEAS-2B <sup>(N)</sup> ; n.d       |              |                                                 |                                |                                             |     |
| 72e              | A549; 4.1 ± 0.6                  |              | HeLa; n.d                          |              |                                                 |                                |                                             |     |
|                  | 16HBE <sup>(N)</sup> ; n.d       |              | BEAS-2B <sup>(N)</sup> ; n.d       |              |                                                 |                                |                                             |     |
| 72f              | A549; 15.4 ± 0.1                 |              | HeLa; 6.7 ± 0.7                    |              |                                                 |                                |                                             |     |
|                  | 16HBE <sup>(N)</sup> ; n.d       |              | BEAS-2B <sup>(N)</sup> ; n.d       |              |                                                 |                                |                                             |     |
| 72g <sup>T</sup> | A549; 1.1 ± 0.1                  |              | HeLa; 1.4 ± 0.1                    |              | NADH/ROS/Apoptosis                              | G <sub>2</sub> /M              |                                             |     |
|                  | 16HBE <sup>(N)</sup> ; 1.1 ± 0.1 |              | BEAS-2B <sup>(N)</sup> ; 0.7 ± 0.1 |              |                                                 |                                |                                             |     |
| 73a              |                                  | 11.4 ± 1.8   |                                    | 21.7 ± 1.2   | NADH/LMP/MMP/                                   | No effect                      | Lysosome                                    | 229 |
| 73b              |                                  | 3.5 ± 0.1    |                                    | 2.2 ± 0.7    |                                                 |                                |                                             |     |
| 73c              |                                  | 1.2 ± 0.2    |                                    | 1.5 ± 0.4    |                                                 |                                |                                             |     |

|                         |                   |  |                                     |  |                                                |  |                           |              |     |
|-------------------------|-------------------|--|-------------------------------------|--|------------------------------------------------|--|---------------------------|--------------|-----|
|                         | A549              |  | HeLa                                |  | Apoptosis                                      |  |                           |              |     |
| <b>73d</b>              | 2.6 ± 1.3         |  | 4.3 ± 0.1                           |  | n.d                                            |  |                           |              |     |
| <b>73e</b>              | 2.3 ± 0.1         |  | 2.8 ± 0.3                           |  |                                                |  |                           |              |     |
| <b>73f</b>              | 1.5 ± 0.2         |  | 1.4 ± 0.2                           |  |                                                |  |                           |              |     |
| <b>74a</b>              | A549; 167.0 ± 2.7 |  | HepG2; 183.2 ± 2.1                  |  | NADH                                           |  | n.d                       | Lysosome     | 230 |
|                         | HeLa; 164.0 ± 3.0 |  | BEAS-2B <sup>(N)</sup> ; n.d        |  |                                                |  |                           |              |     |
| <b>74b</b>              | A549; 182.5 ± 3.1 |  | HepG2; 175.0 ± 2.8                  |  | NADH/ROS/Apoptosis                             |  | No effect                 |              |     |
|                         | HeLa; 177.5 ± 3.5 |  | BEAS-2B <sup>(N)</sup> ; n.d        |  |                                                |  |                           |              |     |
| <b>74c</b>              | A549; 193.4 ± 2.5 |  | HepG2; 179.3 ± 3.2                  |  | NADH                                           |  | n.d                       |              |     |
|                         | HeLa; 173.5 ± 2.7 |  | BEAS-2B <sup>(N)</sup> ; n.d        |  |                                                |  |                           |              |     |
| <b>74d</b> <sup>T</sup> | A549; 38.6 ± 0.5  |  | HepG2; 34.6 ± 1.1                   |  | <b>1B</b>                                      |  | G <sub>1</sub>            |              |     |
|                         | HeLa; 35.6 ± 1.8  |  | BEAS-2B <sup>(N)</sup> ; 58.8 ± 1.7 |  |                                                |  |                           |              |     |
| <b>74e</b> <sup>T</sup> | A549; 50.5 ± 0.7  |  | HepG2; 35.7 ± 0.9                   |  | NADH                                           |  | n.d                       |              |     |
|                         | HeLa; 32.6 ± 1.4  |  | BEAS-2B <sup>(N)</sup> ; 82.1 ± 2.0 |  |                                                |  |                           |              |     |
| <b>74f</b> <sup>T</sup> | A549; 50.3 ± 1.2  |  | HepG2; 46.9 ± 1.3                   |  |                                                |  |                           |              |     |
|                         | HeLa; 41.1 ± 1.7  |  | BEAS-2B <sup>(N)</sup> ; 82.6 ± 1.5 |  |                                                |  |                           |              |     |
| <b>74g</b> <sup>T</sup> | A549; 51.0 ± 0.8  |  | HepG2; 34.8 ± 0.9                   |  |                                                |  |                           |              |     |
|                         | HeLa; 33.1 ± 1.0  |  | BEAS-2B <sup>(N)</sup> ; 57.8 ± 0.9 |  |                                                |  |                           |              |     |
| <b>74h</b>              | A549; > 100       |  | HepG2; > 100                        |  | Slight loss in MMP<br>ROS not the major<br>MoA |  | No effect                 | Mitochondria | 231 |
|                         | HeLa; > 100       |  | BEAS-2B <sup>(N)</sup> ; n.d        |  |                                                |  |                           |              |     |
| <b>74i</b>              | A549; > 100       |  | HepG2; > 100                        |  |                                                |  | n.d                       |              |     |
|                         | HeLa; > 100       |  | BEAS-2B <sup>(N)</sup> ; n.d        |  |                                                |  |                           |              |     |
| <b>74j</b>              | A549; > 100       |  | HepG2; > 100                        |  |                                                |  |                           |              |     |
|                         | HeLa; > 100       |  | BEAS-2B <sup>(N)</sup> ; n.d        |  |                                                |  |                           |              |     |
| <b>74k</b>              | A549; > 100       |  | HepG2; > 100                        |  |                                                |  |                           |              |     |
|                         | HeLa; > 100       |  | BEAS-2B <sup>(N)</sup> ; n.d        |  |                                                |  |                           |              |     |
| <b>74l</b> <sup>T</sup> | A549; 20.5 ± 0.4  |  | HepG2; 12.5 ± 2.8                   |  | MMP/Apoptosis<br>ROS not the major<br>MoA      |  | Sub-G <sub>1</sub> &<br>S | Mitochondria |     |
|                         | HeLa; 6.9 ± 0.7   |  | BEAS-2B <sup>(N)</sup> ; 6.9 ± 0.7  |  |                                                |  |                           |              |     |
| <b>74m</b> <sup>T</sup> | A549; 5.4 ± 1.4   |  | HepG2; 23.0 ± 0.7                   |  |                                                |  | n.d                       |              |     |
|                         | HeLa; 3.4 ± 0.1   |  | BEAS-2B <sup>(N)</sup> ; 1.9 ± 0.7  |  |                                                |  |                           |              |     |
| <b>75a</b>              | 32.4 ± 3.5        |  | 12.3 ± 1.8                          |  | 35.3 ± 0.2                                     |  | n.d                       | Lysosome     | 232 |
| <b>75b</b>              | 11.7 ± 0.1        |  | 9.1 ± 0.5                           |  | 14.8 ± 0.4                                     |  |                           |              |     |
| <b>75c</b>              | 7.6 ± 0.4         |  | 7.5 ± 0.2                           |  | 9.2 ± 0.2                                      |  |                           |              |     |

|                                                         |                               |                   |                                    |                                     |                                                    |            |                                                                  |                |     |     |
|---------------------------------------------------------|-------------------------------|-------------------|------------------------------------|-------------------------------------|----------------------------------------------------|------------|------------------------------------------------------------------|----------------|-----|-----|
| <b>75d</b>                                              | A549<br>(24h)                 | 25.8 ± 2.0        | A549<br>(48h)                      | 10.2 ± 0.9                          | HeLa<br>(24h)                                      | 28.3 ± 1.5 | NADH                                                             |                |     |     |
| <b>75e</b>                                              |                               | 10.0 ± 0.9        |                                    | 8.9 ± 0.4                           |                                                    | 13.7 ± 0.6 |                                                                  |                |     |     |
| <b>75f</b>                                              |                               | 6.6 ± 0.3         |                                    | 3.7 ± 0.2                           |                                                    | 9.4 ± 0.4  |                                                                  |                |     |     |
| <b>75g</b>                                              |                               | 14.1 ± 0.1        |                                    | 12.1 ± 0.5                          |                                                    | 18.4 ± 0.5 |                                                                  |                |     |     |
| <b>75h</b>                                              |                               | 5.6 ± 0.5         |                                    | 5.0 ± 0.1                           |                                                    | 9.1 ± 0.47 |                                                                  |                |     |     |
| <b>75i</b> <sup>T</sup>                                 | A549 (24h); 3.4 ± 0.2         |                   | A549 (48h); 2.9 ± 0.2              |                                     | <b>1B</b>                                          |            | G <sub>1</sub>                                                   | Lysosome       |     |     |
|                                                         | HeLa (24h); 6.7 ± 0.1         |                   | BEAS-2B <sup>(N)</sup> ; 3.8 ± 0.5 |                                     |                                                    |            |                                                                  |                |     |     |
| <b>75j</b>                                              | A549<br>(24h)                 | 20.7 ± 1.9        | A549<br>(48h)                      | 13.2 ± 0.7                          | HeLa<br>(24h)                                      | 23.3 ± 0.6 | n.d                                                              |                |     |     |
| <b>75k</b>                                              |                               | 10.7 ± 0.6        |                                    | 7.8 ± 0.5                           |                                                    | 13.5 ± 0.3 |                                                                  |                |     |     |
| <b>75l</b>                                              |                               | 3.4 ± 0.1         |                                    | 3.0 ± 0.4                           |                                                    | 6.7 ± 0.2  |                                                                  |                |     |     |
| <b>75m</b>                                              |                               | 21.5 ± 0.9        |                                    | 15.4 ± 0.2                          |                                                    | 25.4 ± 0.8 |                                                                  |                |     |     |
| <b>75n</b>                                              |                               | 12.9 ± 0.6        |                                    | 12.6 ± 0.3                          |                                                    | 14.2 ± 0.3 |                                                                  |                |     |     |
| <b>75o</b>                                              |                               | 3.6 ± 0.2         |                                    | 3.5 ± 0.3                           |                                                    | 6.2 ± 0.2  |                                                                  |                |     |     |
| <b>76</b> <sup>*</sup>                                  | HCT-116; 31.33 ± 12.92        |                   | MIA-PaCa-2; 82.09 ± 2.55           |                                     | ARPE-19 <sup>(N)</sup> ; > 100                     |            | n.d                                                              | n.d            | 165 |     |
| <b>77a</b>                                              | HepG2 (SRB); 11 ± 2           |                   | NCI-H460 (SRB); 0.9 ± 0.01         |                                     | Strong inhibitor of<br>kinesin spindle<br>protein. |            | n.d                                                              |                | 233 |     |
|                                                         | SW620 (SRB); 0.86             |                   | SW480 (SRB); 2.9 ± 0.3             |                                     |                                                    |            |                                                                  |                |     |     |
|                                                         | HCT-116 (SRB); 0.41 ± 0.05    |                   | SiHa (SRB); 3.1 ± 0.2              |                                     |                                                    |            |                                                                  |                |     |     |
| <b>77b</b>                                              | HepG2; 110 ± 77               |                   | NCI-H460; 29 ± 3                   |                                     | Apoptosis\necrosis                                 |            | n.d                                                              | CT-DNA binding | 235 |     |
|                                                         | SW620; 39                     |                   | SW480; 40 ± 2                      |                                     |                                                    |            |                                                                  |                |     |     |
|                                                         | HCT-116; 14 ± 2               |                   | SiHa; 26 ± 1                       |                                     |                                                    |            |                                                                  |                |     |     |
| <b>77c</b>                                              | SiHa; 6.14                    |                   |                                    |                                     |                                                    |            |                                                                  |                |     |     |
| <b>3.2.4.3 Heterocyclic based N<sup>N</sup>-ligands</b> |                               |                   |                                    |                                     |                                                    |            |                                                                  |                |     |     |
| <b>78</b>                                               | A2780; > 300                  |                   |                                    | A2780cisR; > 300                    |                                                    |            |                                                                  | n.d            |     | 237 |
| <b>79</b> <sup>*</sup>                                  | DI; 30-40                     |                   |                                    |                                     |                                                    |            | DNA intercalative/<br>electrostatic<br>interactions<br>Apoptosis | n.d            | DNA | 238 |
| <b>80</b>                                               | n.d                           |                   |                                    |                                     |                                                    |            | DNA binding<br>Apoptosis                                         | n.d            | DNA | 239 |
| <b>81a</b>                                              | n.d                           |                   |                                    |                                     |                                                    |            | Cross-linked DNA<br>binding                                      | n.d            | DNA | 240 |
| <b>81b</b>                                              | n.d                           |                   |                                    |                                     |                                                    |            |                                                                  | n.d            | DNA |     |
| <b>81c</b> <sup>*</sup>                                 | A549 (MTS); > 500             | Hela (MTS); > 500 | MT4 (MTS); 67 ± 6                  | HEK-293 <sup>(N)</sup> (MTS); > 500 |                                                    |            |                                                                  | n.d            | DNA | 10  |
|                                                         | BHK21 <sup>(N)</sup> ; 55 ± 1 |                   |                                    |                                     |                                                    |            |                                                                  |                |     |     |



|                         |                                                                                           |      |                       |      |                                  |      |                                      |     |               |                                         |                                  |     |                                    |     |             |  |
|-------------------------|-------------------------------------------------------------------------------------------|------|-----------------------|------|----------------------------------|------|--------------------------------------|-----|---------------|-----------------------------------------|----------------------------------|-----|------------------------------------|-----|-------------|--|
| <b>81d</b> *            | A549 (MTS); > 500                                                                         |      | Hela (MTS); 2.5 ± 1   |      | MT4 (MTS); 111 ± 7               |      | HEK-293 <sup>(N)</sup> (MTS); > 500  |     |               | n.d                                     |                                  |     |                                    |     |             |  |
|                         | BHK21 <sup>(N)</sup> (MTS); n.d                                                           |      |                       |      |                                  |      |                                      |     |               |                                         |                                  |     |                                    |     |             |  |
| <b>82</b>               | arterial thrombosis or the bidirectional crosstalk between platelets and tumor cells; 6µM |      |                       |      |                                  |      |                                      |     |               |                                         | n.d                              | 241 |                                    |     |             |  |
| <b>83</b> *             | MV-4-11; 81.5 ± 9.4                                                                       |      | MCF-7; > 100          |      | BALB/3T3 <sup>(N)</sup> ; > 100  |      | DNA electrostatic interactions       |     | n.d           | Endoplasmic reticulum and Mitochondria. | 242                              |     |                                    |     |             |  |
|                         | HL-60; 30.86 ± 0.75                                                                       |      | LoVo; 61 ± 0          |      |                                  |      |                                      |     |               |                                         |                                  |     |                                    |     |             |  |
| <b>84a</b> <sup>T</sup> | A2780; 22.0 ± 2.5                                                                         |      | A2780cisR; 32.7 ± 1.7 |      | PNT2 <sup>(N)</sup> ; 32.1 ± 3.9 |      | NADH/ROS                             |     | n.d           |                                         | 113                              |     |                                    |     |             |  |
| <b>84b</b>              | DU-145; 8.6 ± 0.8                                                                         |      | A375; 6.5 ± 0.6       |      | HepG2; 8.7 ± 0.8                 |      | NADH                                 |     | n.d           |                                         | 138                              |     |                                    |     |             |  |
|                         | A549; 3.7 ± 0.4                                                                           |      | MCF-7; 12.6 ± 1.3     |      |                                  |      |                                      |     |               |                                         |                                  |     |                                    |     |             |  |
| <b>84c</b>              | DU-145; 11.0 ± 1.0                                                                        |      | A375; 12.0 ± 0.9      |      | HepG2; 10.0 ± 0.5                |      |                                      |     |               |                                         |                                  |     |                                    |     |             |  |
|                         | A549; 10.1 ± 0.7                                                                          |      | MCF-7; 13.1 ± 0.9     |      |                                  |      |                                      |     |               |                                         |                                  |     |                                    |     |             |  |
| <b>85</b>               | A549; > 200                                                                               |      | SW480; > 200          |      | HepG2; 130 ± 9                   |      | A2780; 162 ± 12                      |     | IMR-90; > 200 |                                         | DNA binding                      | n.d | DNA                                | 124 |             |  |
| <b>86a</b>              | A2780                                                                                     |      |                       |      |                                  |      |                                      |     |               |                                         |                                  |     | n.d                                | 243 |             |  |
| <b>86b</b>              |                                                                                           |      |                       |      |                                  |      |                                      |     |               |                                         |                                  |     |                                    |     | > 100       |  |
| <b>86c</b>              |                                                                                           |      |                       |      |                                  |      |                                      |     |               |                                         |                                  |     |                                    |     | 76.9 ± 11.4 |  |
| <b>86d</b>              |                                                                                           |      |                       |      |                                  |      |                                      |     |               |                                         |                                  |     |                                    |     | 23.5 ± 1.1  |  |
| <b>86e</b>              |                                                                                           |      |                       |      |                                  |      |                                      |     |               |                                         |                                  |     |                                    |     | 70.6 ± 2.6  |  |
| <b>86f</b>              |                                                                                           |      |                       |      |                                  |      |                                      |     |               |                                         |                                  |     |                                    |     | 87.1 ± 5.3  |  |
| <b>87a</b>              | A2780 (SRB)                                                                               | n.d  | ID8 (SRB)             | n.d  | Cap-an2 (SRB)                    | n.d  | Sasos (SRB)                          | n.d | L428 (SRB)    | n.d                                     | Fibro-Blast <sup>(N)</sup> (SRB) | n.d | ROS/ Activates cytostatic activity | 244 |             |  |
| <b>87b</b>              |                                                                                           | n.d  |                       | n.d  |                                  | n.d  |                                      | n.d |               | n.d                                     |                                  | n.d |                                    |     |             |  |
| <b>87c</b>              |                                                                                           | n.d  |                       | n.d  |                                  | n.d  |                                      | n.d |               | n.d                                     |                                  | n.d |                                    |     |             |  |
| <b>87d</b>              |                                                                                           | n.d  |                       | n.d  |                                  | n.d  |                                      | n.d |               | n.d                                     |                                  | n.d |                                    |     |             |  |
| <b>87e</b>              |                                                                                           | n.d  |                       | n.d  |                                  | n.d  |                                      | n.d |               | n.d                                     |                                  | n.d |                                    |     |             |  |
| <b>87f</b>              |                                                                                           | 1.64 |                       | 0.98 |                                  | 4.15 |                                      | n.d |               | n.d                                     |                                  | n.d |                                    |     |             |  |
| <b>87g</b>              |                                                                                           | n.d  |                       | n.d  |                                  | n.d  |                                      | n.d |               | n.d                                     |                                  | n.d |                                    |     |             |  |
| <b>87h</b>              |                                                                                           | n.d  |                       | n.d  |                                  | n.d  |                                      | n.d |               | n.d                                     |                                  | n.d |                                    |     |             |  |
| <b>87i</b>              |                                                                                           | n.d  |                       | n.d  |                                  | n.d  |                                      | n.d |               | n.d                                     |                                  | n.d |                                    |     |             |  |
| <b>87j</b>              |                                                                                           | n.d  |                       | n.d  |                                  | n.d  |                                      | n.d |               | n.d                                     |                                  | n.d |                                    |     |             |  |
| <b>87k</b>              |                                                                                           | n.d  |                       | n.d  |                                  | n.d  |                                      | n.d |               | n.d                                     |                                  | n.d |                                    |     |             |  |
| <b>87l</b>              |                                                                                           | n.d  |                       | n.d  |                                  | n.d  |                                      | n.d |               | n.d                                     |                                  | n.d |                                    |     |             |  |
| <b>87m</b>              | A2780 (SRB); 0.891                                                                        |      | ID8 (SRB); 0.799      |      | L428 (SRB); n.d                  |      | Fibroblast <sup>(N)</sup> (SRB); n.d |     | ROS           |                                         | n.d                              | 245 |                                    |     |             |  |
|                         | Capan2 (SRB); 1.93                                                                        |      | Sasos (SRB); 1.58     |      | A2780cis (SRB); 1.535            |      |                                      |     |               |                                         |                                  |     |                                    |     |             |  |

|                                                   |                |       |                   |                   |                           |               |                                    |             |                    |                        |             |                   |  |  |                   |     |  |     |  |
|---------------------------------------------------|----------------|-------|-------------------|-------------------|---------------------------|---------------|------------------------------------|-------------|--------------------|------------------------|-------------|-------------------|--|--|-------------------|-----|--|-----|--|
| <b>88a</b> <sup>T</sup>                           | A2780<br>(MTT) | n.d   | A2780<br>(SRB)    | 1.69              | Fibroblast <sup>(N)</sup> | n.d           | Fibroblast <sup>(N)</sup><br>(SRB) | 14.14       | Induced cytostasis | n.d                    |             | 246               |  |  |                   |     |  |     |  |
| <b>88b</b>                                        |                | 11.64 |                   | 6.20              |                           | n.d           |                                    | n.d         |                    |                        |             |                   |  |  |                   |     |  |     |  |
| <b>88c</b>                                        |                | n.d   |                   | n.d               |                           | n.d           |                                    | n.d         |                    |                        |             |                   |  |  |                   |     |  |     |  |
| <b>88d</b>                                        |                | n.d   |                   | n.d               |                           | n.d           |                                    | n.d         |                    |                        |             |                   |  |  |                   |     |  |     |  |
| <b>88e</b>                                        |                | n.d   |                   | n.d               |                           | n.d           |                                    | n.d         |                    |                        |             |                   |  |  |                   |     |  |     |  |
| <b>88f</b>                                        |                | n.d   |                   | n.d               |                           | n.d           |                                    | n.d         |                    |                        |             |                   |  |  |                   |     |  |     |  |
| <b>89a</b>                                        | DI             |       |                   | n.d               |                           |               |                                    |             | n.d                |                        | 247         |                   |  |  |                   |     |  |     |  |
| <b>89b</b>                                        |                |       |                   | 26                |                           |               |                                    |             |                    |                        |             |                   |  |  |                   |     |  |     |  |
| <b>90a</b>                                        | A549           |       |                   | 245 ± 4.23        |                           |               |                                    | DNA binding | n.d                | DNA & G–C rich region. | 248,<br>249 |                   |  |  |                   |     |  |     |  |
| <b>90b</b>                                        |                |       |                   | 89 ± 0.79         |                           |               |                                    |             |                    |                        |             |                   |  |  |                   |     |  |     |  |
| <b>90c</b>                                        |                |       |                   | 198.71 ± 4.23     |                           |               |                                    |             |                    |                        |             |                   |  |  |                   |     |  |     |  |
| <b>90d</b>                                        |                |       |                   | 88.12 ± 1.29      |                           |               |                                    |             |                    |                        |             |                   |  |  |                   |     |  |     |  |
| <b>91a</b>                                        |                |       |                   | 96 ± 1.72         |                           |               |                                    |             |                    |                        |             |                   |  |  |                   |     |  |     |  |
| <b>91b</b>                                        |                |       |                   | 74 ± 2.78         |                           |               |                                    |             |                    |                        |             |                   |  |  |                   |     |  |     |  |
| <b>91c</b>                                        |                |       |                   | 76.28 ± 2.45      |                           |               |                                    |             |                    |                        |             |                   |  |  |                   |     |  |     |  |
| <b>91d</b>                                        |                |       |                   | 63.56 ± 1.57      |                           |               |                                    |             |                    |                        |             |                   |  |  |                   |     |  |     |  |
| <b>92a</b>                                        |                |       |                   | 163 ± 0.43        |                           |               |                                    |             |                    |                        |             |                   |  |  |                   |     |  |     |  |
| <b>92b</b>                                        |                |       |                   | 116 ± 3.49        |                           |               |                                    |             |                    |                        |             |                   |  |  |                   |     |  |     |  |
| <b>92c</b>                                        |                |       |                   | 122.66 ± 2.58     |                           |               |                                    |             |                    |                        |             |                   |  |  |                   |     |  |     |  |
| <b>92d</b>                                        |                |       |                   | 93.34 ± 4.87      |                           |               |                                    |             |                    |                        |             |                   |  |  |                   |     |  |     |  |
| <b>3.2.4.4 N<sup>N</sup>-picolinamide ligands</b> |                |       |                   |                   |                           |               |                                    |             |                    |                        |             |                   |  |  |                   |     |  |     |  |
| <b>93a</b>                                        |                |       |                   | HT-29; 34.1 ± 0.7 |                           | MCF-7; 39 ± 2 |                                    |             |                    |                        |             | A2780; 19.7 ± 0.6 |  |  | Trx-R inhibition. | n.d |  | 251 |  |
| <b>93b</b>                                        | HT-29; 81 ± 1  |       | MCF-7; 149 ± 1    |                   | A2780; 27 ± 2             |               |                                    | 159         |                    |                        |             |                   |  |  |                   |     |  |     |  |
| <b>93c</b>                                        | A2780          |       |                   |                   | 66 ± 2                    |               |                                    |             |                    |                        |             |                   |  |  |                   |     |  |     |  |
| <b>93d</b>                                        |                |       |                   |                   | 25 ± 3                    |               |                                    |             |                    |                        |             |                   |  |  |                   |     |  |     |  |
| <b>93e</b>                                        |                |       |                   |                   | 33 ± 1                    |               |                                    |             |                    |                        |             |                   |  |  |                   |     |  |     |  |
| <b>93f</b>                                        |                |       |                   |                   | 18.6 ± 0.4                |               |                                    |             |                    |                        |             |                   |  |  |                   |     |  |     |  |
| <b>93g</b>                                        |                |       |                   |                   | 23 ± 1                    |               |                                    |             |                    |                        |             |                   |  |  |                   |     |  |     |  |
| <b>94</b>                                         | HT-29; n.d     |       | A2780; 52.5 ± 0.8 |                   | A2780cis; n.d             |               |                                    | n.d         | n.d                | n.d                    | 157         |                   |  |  |                   |     |  |     |  |
| <b>95</b>                                         | DI; 690        |       |                   |                   |                           |               |                                    |             |                    |                        |             | 252               |  |  |                   |     |  |     |  |
| <b>96a</b>                                        | 17.2 ± 0.7     |       | 14.2 ± 2.8        |                   | n.d                       |               |                                    |             |                    |                        | 110         |                   |  |  |                   |     |  |     |  |
| <b>96b</b>                                        | 12.0 ± 2.1     |       | 14.5 ± 2.8        |                   | 17.5 ± 0.6                |               |                                    |             |                    |                        |             |                   |  |  |                   |     |  |     |  |

|                                     |                          |                        |                        |                       |                                       |                                      |     |                                                            |                          |     |    |
|-------------------------------------|--------------------------|------------------------|------------------------|-----------------------|---------------------------------------|--------------------------------------|-----|------------------------------------------------------------|--------------------------|-----|----|
| 96c <sup>T</sup>                    | A549                     | 30.1 ± 2.1             | HeLa                   | 20.5 ± 4.3            | BEAS-2B <sup>(N)</sup>                | 35.1 ± 0.7                           | 2B  | Influence the A549 cell cycle                              | Lysosome                 |     |    |
| 96d                                 |                          | 22.5 ± 8.5             |                        | 10.5 ± 1.4            |                                       | n.d.                                 |     |                                                            |                          |     |    |
| 96e <sup>T</sup>                    |                          | 13.5 ± 2.9             |                        | 4.9 ± 2.1             |                                       | 10.0 ± 0.7                           |     |                                                            |                          |     |    |
| 96f <sup>T</sup>                    |                          | 7.9 ± 2.1              |                        | 4.9 ± 1.0             |                                       | 2.3 ± 0.5                            |     |                                                            |                          |     |    |
| 96g <sup>T</sup>                    |                          | 14.8 ± 2.1             |                        | 11.4 ± 1.6            |                                       | n.d.                                 |     |                                                            |                          |     |    |
| 96h <sup>T</sup>                    |                          | 34.6 ± 1.9             |                        | 27.7 ± 5.3            |                                       | n.d.                                 |     |                                                            |                          |     |    |
| 96i <sup>T</sup>                    |                          | 14.5 ± 2.7             |                        | 6.9 ± 0.6             |                                       | n.d.                                 |     |                                                            |                          |     |    |
| 96j <sup>T</sup>                    |                          | 9.3 ± 1.5              |                        | 5.8 ± 0.2             |                                       | n.d.                                 |     |                                                            |                          |     |    |
| <b>3.2.5. N<sup>o</sup> ligands</b> |                          |                        |                        |                       |                                       |                                      |     |                                                            |                          |     |    |
| 97a                                 | SK-Mel; 0.8              | SNB-19; 9.8            | C-32; 4.9              | SH-4; 100             |                                       |                                      |     |                                                            |                          | 253 |    |
| 97b                                 | MDA-MB-231; 18.76 ± 0.11 |                        | MCF-7; 13.95 ± 0.12    |                       | A549; 100 ± 0.22                      |                                      |     | n.d.                                                       |                          | 254 |    |
|                                     | HeLa; 24.39 ± 0.20       |                        | HepG2; 26.37 ± 0.25    |                       |                                       |                                      |     |                                                            |                          |     |    |
| 97c                                 | MDA-MB-231; 14.33 ± 0.09 |                        | MCF-7; 5.82 ± 0.08     |                       | A549; 8.13 ± 0.06                     |                                      |     |                                                            |                          |     |    |
|                                     | HeLa; 5.64 ± 0.10        |                        | HepG2; 23.66 ± 0.22    |                       |                                       |                                      |     |                                                            |                          |     |    |
| 97d                                 | MDA-MB-231; 41.3 ± 0.17  |                        | MCF-7; 22.30 ± 0.28    |                       | A549; 20.18 ± 0.18                    |                                      |     |                                                            |                          |     |    |
|                                     | HeLa; 19.40 ± 0.19       |                        | HepG2; 51.87 ± 0.24    |                       |                                       |                                      |     |                                                            |                          |     |    |
| 98a <sup>T</sup>                    | HeLa (24hr); 3.7 ± 3.6   | HeLa (48hr); 2.2 ± 1.1 | HL60 (24hr); 1.8 ± 0.2 | HL60 (48hr); 2 ± 0.34 | HUVEC <sup>(N)</sup> (24hr); 1 ± 0.16 | HUVEC <sup>(N)</sup> (48hr); 5 ± 1.2 |     | n.d.                                                       |                          | 255 |    |
| 98b                                 | n.d.                     |                        |                        |                       |                                       |                                      |     |                                                            |                          |     |    |
| 98c                                 |                          |                        |                        |                       |                                       |                                      |     |                                                            |                          |     |    |
| 99a                                 | A2780 (SRB)              | > 100                  |                        |                       |                                       |                                      |     |                                                            |                          |     | 24 |
| 99b                                 |                          | > 100                  |                        |                       |                                       |                                      |     |                                                            |                          |     |    |
| 99c                                 |                          | 16.30 ± 0.32           |                        |                       |                                       |                                      |     |                                                            |                          |     |    |
|                                     | A549                     | 31.3 ± 0.9             |                        |                       |                                       |                                      |     |                                                            |                          |     | 7  |
| 99d                                 |                          | 5.6 ± 0.4              |                        |                       |                                       |                                      |     |                                                            |                          |     |    |
| 99e                                 |                          | 4.9 ± 0.4              |                        |                       |                                       |                                      |     |                                                            |                          |     |    |
| 99f                                 |                          | > 100                  |                        |                       |                                       |                                      |     |                                                            |                          |     |    |
| 99g                                 |                          | 15.7 ± 1.0             |                        |                       |                                       |                                      |     |                                                            |                          |     |    |
| 99h                                 |                          | 4.4 ± 0.4              |                        |                       |                                       |                                      |     |                                                            |                          |     |    |
|                                     |                          |                        |                        |                       |                                       |                                      | 2AB | Disrupt G <sub>0</sub> /G <sub>1</sub> + G <sub>2</sub> /M | Mitochondria \ Lysosome. |     |    |
|                                     |                          |                        |                        |                       |                                       |                                      | 2AB | G <sub>0</sub> /G <sub>1</sub> +                           | Mitochondria\            |     |    |

|                   |                            |                    |                                  |                       |                                 |                                                             |                   |           |                     |
|-------------------|----------------------------|--------------------|----------------------------------|-----------------------|---------------------------------|-------------------------------------------------------------|-------------------|-----------|---------------------|
|                   |                            |                    |                                  |                       |                                 |                                                             | G <sub>2</sub> /M | Lysosome. |                     |
| 99i               |                            | 15.4 ± 0.1         |                                  |                       |                                 |                                                             |                   |           |                     |
| 99j               |                            | 43.8 ± 4.9         |                                  |                       |                                 |                                                             |                   |           |                     |
| 100a              | HT-29; 5.1 ± 0.3           | MCF-7; 11.0 ± 0.40 | A2780; 5.70 ± 0.10               | A2780cis; 5.80 ± 0.50 | ARPE-19 <sup>(N)</sup> ; n.d    | Trx-R inhibition.<br>Apoptosis/ Single strand DNA breakage. |                   | DNA       | 158,<br>251,<br>256 |
| 100b              | HT-29; 83.00 ± 3.00        | MCF-7; n.d         | A2780; n.d                       | A2780cis; n.d         | ARPE-19 <sup>(N)</sup> ; n.d    |                                                             |                   |           |                     |
| 100c <sup>T</sup> | HCT-116 p53+/+; 80 ± 1     |                    | HCT-116 p53-/-; 47 ± 2           |                       | MIA-PaCa-2; > 100               |                                                             | n.d               |           |                     |
|                   | A549; > 100                |                    | PNT2 <sup>(N)</sup> ; 55 ± 2     |                       | ARPE-19 <sup>(N)</sup> ; > 100  |                                                             |                   |           |                     |
| 100d <sup>T</sup> | HCT-116 p53+/+; 19 ± 1     |                    | HCT-116 p53-/-; 17.6 ± 0.3       |                       | MIA-PaCa-2; 37 ± 1              |                                                             |                   |           |                     |
|                   | A549; >100                 |                    | PNT2 <sup>(N)</sup> ; 10.8 ± 0.3 |                       | ARPE-19 <sup>(N)</sup> ; > 100  |                                                             |                   |           |                     |
| 100e <sup>T</sup> | HCT-116 p53+/+; 75 ± 2     |                    | HCT-116 p53-/-; 2.8 ± 0.2        |                       | MIA-PaCa-2; > 100               |                                                             |                   |           |                     |
|                   | A549; > 100                |                    | PNT2 <sup>(N)</sup> ; 40 ± 4     |                       | ARPE-19 <sup>(N)</sup> ; > 100  |                                                             |                   |           |                     |
| 100f <sup>T</sup> | HCT-116 p53+/+; 75 ± 4     |                    | HCT-116 p53-/-; 23 ± 2           |                       | MIA-PaCa-2; > 100               |                                                             |                   |           |                     |
|                   | A549; > 100                |                    | PNT2 <sup>(N)</sup> ; 44 ± 2     |                       | ARPE-19 <sup>(N)</sup> ; > 100  |                                                             |                   |           |                     |
| 100g <sup>*</sup> | HCT-116 p53+/+; 33 ± 1     |                    | HCT-116 p53-/-; 6.6 ± 0.9        |                       | MIA-PaCa-2; > 100               |                                                             |                   |           |                     |
|                   | A549; 43 ± 1               |                    | PNT2 <sup>(N)</sup> ; 20 ± 1     |                       | ARPE-19 <sup>(N)</sup> ; 71 ± 2 |                                                             |                   |           |                     |
| 100h <sup>T</sup> | HCT-116 p53+/+; > 100      |                    | HCT-116 p53-/-; 67 ± 2           |                       | MIA-PaCa-2; > 100               |                                                             |                   |           |                     |
|                   | A549; > 100                |                    | PNT2 <sup>(N)</sup> ; > 100      |                       | ARPE-19 <sup>(N)</sup> ; > 100  |                                                             |                   |           |                     |
| 100i <sup>T</sup> | HCT-116 p53+/+; 20.7 ± 0.2 |                    | HCT-116 p53-/-; 17 ± 1           |                       | MIA-PaCa-2; 31.5 ± 0.7          |                                                             |                   |           |                     |
|                   | A549; > 100                |                    | PNT2 <sup>(N)</sup> ; > 100      |                       | ARPE-19 <sup>(N)</sup> ; > 100  |                                                             |                   |           |                     |
| 100j <sup>T</sup> | HCT-116 p53+/+; 24 ± 2     |                    | HCT-116 p53-/-; 4.9 ± 0.6        |                       | MIA-PaCa-2; 35 ± 1              |                                                             |                   |           |                     |
|                   | A549; 52 ± 2               |                    | PNT2 <sup>(N)</sup> ; 20 ± 1     |                       | ARPE-19 <sup>(N)</sup> ; > 100  |                                                             |                   |           |                     |
| 100k <sup>T</sup> | HCT-116 p53+/+; 42 ± 2     |                    | HCT-116 p53-/-; 37 ± 2           |                       | MIA-PaCa-2; 66 ± 2              |                                                             |                   |           |                     |
|                   | A549; > 100                |                    | PNT2 <sup>(N)</sup> ; 41 ± 2     |                       | ARPE-19 <sup>(N)</sup> ; > 100  |                                                             |                   |           |                     |
| 101a              | A549                       | 30.9 ± 1.6         | HeLa                             | 36.0 ± 10.4           |                                 | n.d                                                         |                   | 257       |                     |
| 101b              |                            | 12.0 ± 0.1         |                                  | 9.9 ± 0.1             | 1B /Metastasis                  | n.d                                                         | Lysosome          |           |                     |
| 101c              |                            | 13.1 ± 0.8         |                                  | 10.8 ± 0.1            |                                 | n.d                                                         |                   |           |                     |
| 101d              |                            | 39.6 ± 1.0         |                                  | 40.7 ± 12.9           |                                 |                                                             |                   |           |                     |
| 101e              |                            | 24.2 ± 4.2         |                                  | 22.1 ± 0.5            | 1B /Metastasis                  | n.d                                                         | Lysosome          |           |                     |
| 101f              |                            | 33.4 ± 0.7         |                                  | 39.2 ± 2.5            |                                 | n.d                                                         |                   |           |                     |
| 102a              | MDA-MB-231<br>(WST-8)      | 157 ± 1.41         | Caco-2<br>(WST-8)                | 29.0 ± 0.36           |                                 | n.d                                                         |                   | 258       |                     |
| 102b              |                            | 67 ± 0.01          |                                  | 32 ± 0.18             |                                 |                                                             |                   |           |                     |
| 103a <sup>T</sup> |                            | 24.4 ± 5.2         |                                  | 19.5 ± 2.0            |                                 | 72.14 ± 2.24                                                | n.d               | 144       |                     |

|                                      |                                                                       |            |        |                               |                        |              |                            |                                                           |                         |                     |     |     |     |     |
|--------------------------------------|-----------------------------------------------------------------------|------------|--------|-------------------------------|------------------------|--------------|----------------------------|-----------------------------------------------------------|-------------------------|---------------------|-----|-----|-----|-----|
| <b>103b</b>                          | A549                                                                  | > 100      | HeLa   | > 100                         | BEAS-2B <sup>(N)</sup> | n.d          | <b>1B</b> /Metastasis      | n.d                                                       | Lysosome                |                     |     |     |     |     |
| <b>103c</b> <sup>T</sup>             |                                                                       | 18.2 ± 1.3 |        | 14.9 ± 2.6                    |                        | 73.72 ± 0.38 |                            | G <sub>0</sub> /G <sub>1</sub> , S, and G <sub>2</sub> /M |                         |                     |     |     |     |     |
| <b>103d</b>                          |                                                                       | > 100      |        | > 100                         |                        | n.d          |                            | n.d                                                       |                         |                     |     |     |     |     |
| <b>103e</b>                          |                                                                       | > 100      |        | > 100                         |                        | n.d          |                            | n.d                                                       |                         |                     |     |     |     |     |
| <b>104</b>                           | HeLa; Negligible toxicity for cell imaging at a concentration of 5 µM |            |        |                               |                        |              |                            | n.d                                                       | Mitochondria            | 259                 |     |     |     |     |
| <b>105a</b>                          | n.d                                                                   |            |        |                               |                        |              |                            | n.d                                                       |                         | 260                 |     |     |     |     |
| <b>105b</b> <sup>T</sup>             | MCF-7; 21 ± 1.3                                                       |            |        | CHO <sup>(N)</sup> ; 96 ± 6.0 |                        |              |                            |                                                           |                         |                     |     |     |     |     |
| <b>105c</b>                          | n.d                                                                   |            |        |                               |                        |              |                            |                                                           |                         |                     |     |     |     |     |
| <b>3.2.6. N<sup>^</sup>P ligands</b> |                                                                       |            |        |                               |                        |              |                            |                                                           |                         |                     |     |     |     |     |
| <b>106a</b>                          | A549                                                                  |            |        |                               | 6.5 ± 1.0              |              |                            | NADH                                                      | n.d                     |                     | 93  |     |     |     |
| <b>106b</b>                          |                                                                       |            |        |                               | 7.2 ± 2.0              |              |                            |                                                           |                         |                     |     |     |     |     |
| <b>106c</b>                          |                                                                       |            |        |                               | 6.9 ± 0.6              |              |                            | <b>1B</b> /Necrosis                                       |                         |                     |     |     |     |     |
| <b>106d</b>                          |                                                                       |            |        |                               | 25.3 ± 0.1             |              |                            | NADH                                                      |                         |                     |     |     |     |     |
| <b>106e</b>                          |                                                                       |            |        |                               | 6.3 ± 0.1              |              |                            |                                                           |                         |                     |     |     |     |     |
| <b>106f</b>                          |                                                                       |            |        |                               | 7.9 ± 0.9              |              |                            | Necrosis                                                  |                         |                     |     |     |     |     |
| <b>106g</b>                          |                                                                       |            |        |                               | 5.8 ± 0.2              |              |                            |                                                           |                         |                     |     |     |     |     |
| <b>106h</b>                          |                                                                       |            |        |                               | 4.7 ± 1.5              |              |                            |                                                           |                         |                     |     |     |     |     |
| <b>107a</b> <sup>T</sup>             | A549                                                                  | 14.7 ± 0.4 | HeLa   | 9.1 ± 0.2                     | BEAS-2B <sup>(N)</sup> | 25.3 ± 0.6   | ROS/Apoptosis              | n.d                                                       | Lysosome                | 262                 |     |     |     |     |
| <b>107b</b> <sup>T</sup>             |                                                                       | 15.6 ± 0.1 |        | 8.0 ± 0.1                     |                        | 27.6 ± 0.1   |                            |                                                           |                         |                     |     |     |     |     |
| <b>107c</b> <sup>T</sup>             |                                                                       | 15.2 ± 0.1 |        | 8.5 ± 0.4                     |                        | 25.6 ± 0.2   |                            |                                                           |                         |                     |     |     |     |     |
| <b>107d</b> <sup>T</sup>             |                                                                       | 16.1 ± 0.2 |        | 7.2 ± 0.7                     |                        | 29.3 ± 0.3   |                            |                                                           |                         |                     |     |     |     |     |
| <b>3.2.7. N<sup>^</sup>S ligands</b> |                                                                       |            |        |                               |                        |              |                            |                                                           |                         |                     |     |     |     |     |
| <b>108a</b> <sup>T</sup>             | A549                                                                  | 39.4 ± 1.3 | DU-145 | 49.0 ± 2.8                    | HeLa                   | 41.6 ± 2.3   | MCF-7                      | 51.4 ± 2.4                                                | HEK-293T <sup>(N)</sup> | 90.6 ± 2.7          | n.d |     | 263 |     |
| <b>108b</b> <sup>T</sup>             |                                                                       | 21.4 ± 1.5 |        | 38.0 ± 1.9                    |                        | 26.3 ± 1.6   |                            | 39.7 ± 1.7                                                |                         | 134.4 ± 3.5         |     |     |     |     |
| <b>108c</b> <sup>T</sup>             |                                                                       | 18.1 ± 1.1 |        | 31.6 ± 1.9                    |                        | 23.4 ± 1.7   |                            | 37.4 ± 1.4                                                |                         | 110.3 ± 3.3         |     |     |     |     |
| <b>109a</b>                          | PC3 (light) (WST-8); 5.5                                              |            |        | SKOV-3(dark) (WST-8); 20.5    |                        |              | SKOV-3(light) (WST-8); 2.7 |                                                           |                         | ROS                 | n.d | 264 |     |     |
| <b>109b</b>                          | PC3 (light) (WST-8); 5.7                                              |            |        | SKOV-3(dark) (WST-8); 12.1    |                        |              | SKOV-3(light) (WST-8); 2.3 |                                                           |                         |                     |     |     |     |     |
| <b>110</b>                           | HCT-116 (SRB);                                                        |            |        | NCI-H460 (SRB);               |                        |              | SiHa (SRB);                |                                                           |                         | SW480 (SRB); 24 ± 6 |     |     | n.d | 266 |

|                                                                         |                   |                  |                       |                     |                                      |             |                                       |                                                           |                                                                          |     |      |     |
|-------------------------------------------------------------------------|-------------------|------------------|-----------------------|---------------------|--------------------------------------|-------------|---------------------------------------|-----------------------------------------------------------|--------------------------------------------------------------------------|-----|------|-----|
|                                                                         | 15 ± 2            |                  | 18 ± 4                |                     | 46 ± 6                               |             |                                       |                                                           |                                                                          |     |      |     |
| <b>111</b>                                                              | BE; 36.29 ± 8.68  |                  | HT-29; 49.55 ± 2.97   |                     | MIA-Pa-Ca2; 17.12 ± 4.58             |             | ARPE-19 <sup>(N)</sup> ; 59.71 ± 1.75 |                                                           | Partial intercalators or bind to DNA through electrostatic interactions. | n.d | DNA  | 267 |
| <b>112a</b> <sup>T</sup>                                                | HCT-116           | 1.37 ± 0.09      | Mia-PaCa-2            | 14.33 ± 0.79        | HT-29                                | 4.89 ± 0.56 | ARPE-19 <sup>(N)</sup>                | 18.26 ± 0.58                                              |                                                                          | n.d |      | 268 |
| <b>112b</b> <sup>T</sup>                                                |                   | 5.18 ± 0.12      |                       | 4.48 ± 0.18         |                                      | 6.99 ± 0.51 |                                       | 9.79 ± 0.05                                               |                                                                          |     |      |     |
| <b>112c</b> <sup>T</sup>                                                |                   | 5.50 ± 1.86      |                       | 6.22 ± 0.07         |                                      | 8.09 ± 1.06 |                                       | 18.25 ± 0.48                                              |                                                                          |     |      |     |
| <b>113a</b>                                                             | n.d               |                  |                       |                     |                                      |             |                                       |                                                           |                                                                          | n.d |      | 269 |
| <b>113b</b>                                                             |                   |                  |                       |                     |                                      |             |                                       |                                                           |                                                                          |     |      |     |
| <b>3.2.8. O<sup>^</sup>O, O<sup>^</sup>P and O<sup>^</sup>S ligands</b> |                   |                  |                       |                     |                                      |             |                                       |                                                           |                                                                          |     |      |     |
| <b>114</b>                                                              | HT-29; 20 ± 1     |                  |                       |                     | MCF-7; 13.2 ± 0.2                    |             |                                       |                                                           |                                                                          | n.d |      | 251 |
| <b>115</b> <sup>*</sup>                                                 | HT-29; 93.00 ± 7  | MCF-7; 51.00 ± 4 | A2780; 35.00 ± 1      | A2780cis; 51.00 ± 1 | ARPE-19 <sup>(N)</sup> ; > 100       |             |                                       | Trx-R Inhibition / very low levels of apoptosis/necrosis. | n.d                                                                      |     | 158  |     |
| <b>116a</b> <sup>T</sup>                                                | A2780; 23.2 ± 0.8 |                  | A2780cisR; 14.1 ± 2.5 |                     | HEK-293T <sup>(N)</sup> ; 16.3 ± 0.7 |             |                                       |                                                           | n.d                                                                      |     | 270  |     |
| <b>116b</b> <sup>T</sup>                                                | A2780; 20.7 ± 5.6 |                  | A2780cisR; 23.6 ± 2.3 |                     | HEK-293T <sup>(N)</sup> ; 26.1 ± 2.9 |             |                                       |                                                           |                                                                          |     | 270, |     |
|                                                                         | HepG2; 37.9 ± 2.2 |                  | HeLa; 59.6 ± 0.7      |                     | HEK-293T <sup>(N)</sup> ; 67.8 ± 3.8 |             |                                       |                                                           |                                                                          |     | 272  |     |
| <b>116c</b> <sup>T</sup>                                                | A2780             | 23.2 ± 2.3       | A2780cisR             | 39.4 ± 9.4          | HEK-293T <sup>(N)</sup>              | 29.4 ± 3.9  |                                       |                                                           |                                                                          |     |      | 271 |
| <b>116d</b> <sup>T</sup>                                                |                   | 21.0 ± 1.0       |                       | 33.3 ± 3.6          |                                      | 15.6 ± 1.4  |                                       |                                                           |                                                                          |     |      |     |
| <b>116e</b> <sup>T</sup>                                                |                   | 94.4 ± 4.1       |                       | 89.2 ± 5.2          |                                      | 89.1 ± 3.3  |                                       |                                                           |                                                                          |     |      |     |
| <b>116f</b> <sup>T</sup>                                                |                   | 11.1 ± 1.1       |                       | 17.0 ± 0.5          |                                      | 11.6 ± 3.1  |                                       |                                                           |                                                                          |     |      |     |
| <b>116g</b> <sup>T</sup>                                                |                   | 26.9 ± 0.7       |                       | 22.4 ± 2.3          |                                      | 15.0 ± 2.6  |                                       |                                                           |                                                                          |     |      |     |
| <b>116h</b> <sup>T</sup>                                                |                   | 37.6 ± 2.1       |                       | 34.7 ± 0.9          |                                      | 21.0 ± 0.1  |                                       |                                                           |                                                                          |     |      |     |
| <b>116i</b> <sup>T</sup>                                                |                   | 24.0 ± 1.2       |                       | 43.0 ± 3.7          |                                      | 24.3 ± 0.3  |                                       |                                                           |                                                                          |     |      |     |
| <b>116j</b> <sup>T</sup>                                                |                   | 16.9 ± 2.4       |                       | 24.6 ± 2.1          |                                      | 10.0 ± 6.7  |                                       |                                                           |                                                                          |     |      |     |
| <b>117a</b> <sup>T</sup>                                                | HepG2             | 49.2 ± 2.4       | HeLa                  | 30.1 ± 2.1          | HEK-293T <sup>(N)</sup>              | 63.3 ± 3.9  |                                       |                                                           |                                                                          |     |      | 272 |
| <b>117b</b> <sup>T</sup>                                                |                   | 44.3 ± 3.1       |                       | 25.1 ± 0.2          |                                      | 79.2 ± 5.2  |                                       |                                                           |                                                                          |     |      |     |
| <b>117c</b> <sup>*</sup>                                                |                   | > 100            |                       | >100                |                                      | > 100       |                                       |                                                           |                                                                          |     |      |     |

|                                                                 |       |            |             |             |                        |             |                             |                                |           |                              |                             |     |                                          |      |
|-----------------------------------------------------------------|-------|------------|-------------|-------------|------------------------|-------------|-----------------------------|--------------------------------|-----------|------------------------------|-----------------------------|-----|------------------------------------------|------|
| <b>117d</b> <sup>T</sup>                                        |       | 90.1 ± 6.3 |             | >100        |                        | 60.0 ± 5.7  |                             |                                |           |                              |                             |     |                                          |      |
| <b>117e</b> <sup>T</sup>                                        |       | 42.9 ± 3.3 |             | 34.8 ± 2.7  |                        | 75.1 ± 6.5  |                             |                                |           |                              |                             |     |                                          |      |
| <b>117f</b> <sup>*</sup>                                        |       | 54.7 ± 0.3 |             | 43.7 ± 3.4  |                        | > 100       |                             |                                |           |                              |                             |     |                                          |      |
| <b>118a</b>                                                     | SW480 |            | 51.9 ± 1.6  | A549        |                        | > 200       | ROS /Necrosis /DNA binding. | G <sub>0</sub> /G <sub>1</sub> | DNA       | 273                          |                             |     |                                          |      |
| <b>118b</b>                                                     |       |            | 119.8 ± 1.1 |             |                        | > 200       |                             |                                |           |                              |                             |     |                                          |      |
| <b>118c</b>                                                     |       |            | > 200       |             |                        | 36.8 ± 1.2  |                             |                                |           |                              |                             |     |                                          |      |
| <b>118d</b>                                                     |       |            | 15.9 ± 1.3  |             |                        | 18.9 ± 1.1  |                             |                                |           |                              |                             |     |                                          |      |
| <b>119a</b> <sup>T</sup>                                        | HeLa  | 1.2 ± 0.1  | A549        | 4.9 ± 1.2   | BEAS-2B <sup>(N)</sup> | 1.3 ± 0.2   | 16HB E <sup>(N)</sup>       | 1.9 ± 0.2                      | <b>1B</b> | S-phase + G <sub>2</sub> / M | Lysosome\ Mitochondria.     | 274 |                                          |      |
| <b>119b</b> <sup>T</sup>                                        |       | 3.8 ± 0.2  |             | 4.4 ± 0.4   |                        | 3.5 ± 0.1   |                             | 4.5 ± 0.2                      | NADH      | n.d.                         |                             |     |                                          |      |
| <b>119c</b> <sup>T</sup>                                        |       | 1.6 ± 0.3  |             | 7.5 ± 1.1   |                        | 2.8 ± 0.4   |                             | 3.0 ± 0.1                      |           |                              |                             |     |                                          |      |
| <b>120a</b> <sup>T</sup>                                        | HeLa  | 7.9 ± 0.2  | A549        | 23.2 ± 1.4  | 16HBE <sup>(N)</sup>   | 26.7 ± 0.6  | NADH                        | n.d.                           | NADH      | n.d.                         | Lysosome                    | 106 |                                          |      |
| <b>120b</b> <sup>T</sup>                                        |       | 5.9 ± 0.3  |             | 6.5 ± 0.4   |                        | 11.9 ± 0.9  |                             |                                |           |                              |                             |     |                                          |      |
| <b>120c</b> <sup>T</sup>                                        |       | 3.6 ± 0.3  |             | 20.8 ± 2.5  |                        | 7.0 ± 0.3   |                             |                                |           |                              |                             |     | S-phase                                  |      |
| <b>120d</b>                                                     |       | 17.8 ± 0.6 |             | 34.4 ± 0.3  |                        | n.d.        |                             |                                |           |                              |                             |     | NADH                                     | n.d. |
| <b>120e</b>                                                     |       | 10.9 ± 0.1 |             | 12.5 ± 0.5  |                        | n.d.        |                             |                                |           |                              |                             |     |                                          |      |
| <b>120f</b>                                                     |       | 32.4 ± 0.2 |             | 25.8 ± 0.2  |                        | n.d.        |                             |                                |           |                              |                             |     |                                          |      |
| <b>120g</b>                                                     |       | n.d.       |             | n.d.        |                        | n.d.        |                             |                                |           |                              |                             |     |                                          |      |
| <b>121a</b>                                                     | A549  | 14 ± 6     | SW480       | 6.0 ± 0.7   | CH1/PA-1               | 14 ± 2      | NADH /ROS /Apoptosis        | n.d.                           | NADH      | n.d.                         | -                           | 275 |                                          |      |
| <b>121b</b>                                                     |       | 1.2 ± 0.1  |             | 0.33 ± 0.04 |                        | 0.46 ± 0.02 |                             |                                |           |                              |                             |     |                                          |      |
| <b>122a</b>                                                     |       | 63 ± 6     |             | 4.2 ± 0.2   |                        | 7.0 ± 1.6   |                             |                                |           |                              |                             |     | n.d.                                     |      |
| <b>122b</b>                                                     |       | 2.2 ± 0.8  |             | 0.59 ± 0.08 |                        | 0.82 ± 0.05 |                             |                                |           |                              |                             |     | Disturb the cell cycle at G <sub>1</sub> |      |
| <b>122c</b>                                                     |       | 1.1 ± 0.2  |             | 0.54 ± 0.07 |                        | 0.57 ± 0.05 |                             |                                |           |                              |                             |     |                                          |      |
| <b>122d</b>                                                     |       | 2.0 ± 0.4  |             | 0.80 ± 0.15 |                        | 0.68 ± 0.02 |                             |                                |           |                              |                             |     | n.d.                                     |      |
| <b>3.2.9. P<sup>A</sup>P and S<sup>A</sup>S based complexes</b> |       |            |             |             |                        |             |                             |                                |           |                              |                             |     |                                          |      |
| <b>123a</b> <sup>T</sup>                                        | A549  | 4.6 ± 0.1  | HeLa        | 3.4 ± 0.5   | 16HBE <sup>(N)</sup>   | 2.4 ± 0.1   | BEAS-2B <sup>(N)</sup>      | 2.8 ± 0.1                      | NADH      | n.d.                         | DNA is not the main target. | 277 |                                          |      |
| <b>123b</b>                                                     |       | 8.0 ± 0.1  |             | 6.2 ± 0.3   |                        | n.d.        |                             | n.d.                           |           |                              |                             |     |                                          |      |

|                          |                                     |            |                                   |            |                                     |           |                   |                                |                        |          |
|--------------------------|-------------------------------------|------------|-----------------------------------|------------|-------------------------------------|-----------|-------------------|--------------------------------|------------------------|----------|
| <b>123c</b> <sup>T</sup> | A549                                | 3.0 ± 0.2  | HeLa                              | 5.2 ± 0.6  | 16HBE <sup>(N)</sup>                | 6.5 ± 0.7 | <b>1B</b>         | Go/G <sub>1</sub>              | Lysosome               | 261      |
| <b>123d</b>              |                                     | 10.3 ± 0.6 |                                   | 12.9 ± 0.4 |                                     | n.d.      |                   |                                |                        |          |
| <b>123e</b>              |                                     | 3.9 ± 0.4  |                                   | 8.5 ± 0.5  |                                     | n.d.      |                   | S-phase and Sub-G <sub>1</sub> |                        |          |
| <b>123f</b>              |                                     | 2.3 ± 0.1  |                                   | 4.3 ± 0.9  |                                     | n.d.      |                   |                                |                        |          |
| <b>123g</b>              |                                     | 7.4 ± 0.7  |                                   | 10.2 ± 0.6 |                                     | n.d.      |                   | <b>1B</b>                      |                        |          |
| <b>124a</b> <sup>*</sup> | HCT-116p53+/+; > 100                |            | HCT-116p53-/-; > 100              |            | PNT2 <sup>(N)</sup> ; > 100         |           | <b>1B</b>         | n.d.                           |                        | 278      |
| <b>124b</b> <sup>*</sup> | HCT-116p53+/+; > 100                |            | HCT-116p53-/-; > 100              |            | PNT2 <sup>(N)</sup> ; > 100         |           |                   |                                |                        |          |
| <b>124c</b> <sup>*</sup> | HCT-116p53+/+; > 100                |            | HCT-116p53-/-; > 100              |            | PNT2 <sup>(N)</sup> ; > 100         |           |                   |                                |                        |          |
| <b>125a</b> <sup>T</sup> | A549; 14.5 ± 1.5                    |            | HeLa; 12.3 ± 0.1                  |            | HepG2; 3.2 ± 0.2                    |           | <b>1AB or 2AB</b> | n.d.                           | Mitochondria\ Lysosome | 279, 280 |
|                          | BEAS-2B <sup>(N)</sup> ; 11.9 ± 0.3 |            | 16HBE <sup>(N)</sup> ; 13.7 ± 0.5 |            | HepG2; 3.6 ± 0.4                    |           |                   |                                |                        |          |
| <b>125b</b> <sup>T</sup> | A549; 5.1 ± 0.6                     |            | HeLa; 4.9 ± 0.9                   |            | HepG2; 3.6 ± 0.4                    |           |                   |                                |                        |          |
|                          | BEAS-2B <sup>(N)</sup> ; 3.2 ± 0.01 |            | 16HBE <sup>(N)</sup> ; 5.8 ± 0.4  |            | HepG2; 3.8 ± 0.4                    |           |                   |                                |                        |          |
| <b>125c</b> <sup>T</sup> | A549; 3.0 ± 0.1                     |            | HeLa; 4.2 ± 1.3                   |            | HepG2; 3.8 ± 0.4                    |           |                   |                                |                        |          |
|                          | BEAS-2B <sup>(N)</sup> ; 3.4 ± 0.04 |            | 16HBE <sup>(N)</sup> ; 4.7 ± 0.1  |            | HepG2; 3.2 ± 0.1                    |           |                   |                                |                        |          |
| <b>125d</b> <sup>T</sup> | A549; 4.5 ± 1.5                     |            | HeLa; 4.4 ± 0.4                   |            | HepG2; 3.2 ± 0.1                    |           |                   |                                |                        |          |
|                          | BEAS-2B <sup>(N)</sup> ; 4.7 ± 0.9  |            | 16HBE <sup>(N)</sup> ; 5.9 ± 0.6  |            | HepG2; 2.1 ± 0.1                    |           |                   |                                |                        |          |
| <b>125e</b> <sup>T</sup> | A549; 2.4 ± 0.1                     |            | HeLa; 2.2 ± 0.1                   |            | HepG2; 2.1 ± 0.1                    |           |                   |                                |                        |          |
|                          | BEAS-2B <sup>(N)</sup> ; 1.9 ± 1.1  |            | 16HBE <sup>(N)</sup> ; 3.0 ± 0.8  |            | HepG2; 5.8 ± 0.1                    |           |                   |                                |                        |          |
| <b>125f</b> <sup>T</sup> | A549; 5.6 ± 0.1                     |            | HeLa; 3.1 ± 0.01                  |            | HepG2; 5.8 ± 0.1                    |           |                   |                                |                        |          |
|                          | BEAS-2B <sup>(N)</sup> ; 3.5 ± 1.0  |            | 16HBE <sup>(N)</sup> ; 4.8 ± 0.4  |            | BEAS-2B <sup>(N)</sup> ; 31.2 ± 0.9 |           |                   |                                |                        |          |
| <b>125g</b> <sup>T</sup> | A549; 24.2 ± 1.4                    |            | HeLa; 13.5 ± 0.1                  |            | BEAS-2B <sup>(N)</sup> ; 31.2 ± 0.9 |           |                   |                                |                        |          |

<sup>1</sup> IC<sub>50</sub> is defined as the concentration of drug required to inhibit cell growth by 50% compared to the control. Each value represents the mean ± standard deviation from two or three independent experiments.

<sup>2</sup> Cell viability was determined by the MTT assay, other than this is mentioned.

<sup>T</sup>: The complex was examined against normal cell line; <sup>\*</sup>: The complex was safe to the tested normal cell with IC<sub>50</sub> > 100 μM; <sup>N</sup>: Normal cell line; n.d.: not determined.

Mechanism of action according to Fig. 3 (within the main text): **1A** pathway: NADH/ROS/MMP/Apoptosis. **1B** pathway: NADH/ROS/LMP/Apoptosis. **1AB** pathway: NADH/ROS/MMP/LMP/Apoptosis. **2A** pathway: ROS/MMP/Apoptosis.

**Full names and Abbreviations of Cell lines:** 16HBE, human bronchial epithelial cell lines; 518A2, human melanoma cell line; 5637, human bladder cancer cells; 8505C, human thyroid carcinoma; ARPE-19, human retinal epithelial cells; A253, human submandibular gland carcinoma; A2780, human ovarian carcinoma cell lines; A2780R/A2780cisR, Cisplatin resistant human ovarian; A427, human lung carcinoma cells; A549, Human lung carcinoma cell line; A549R, cisplatin resistant human lung



carcinoma cell line; BEAS-2B, human non-tumorigenic lung epithelial cell line; BEL-7402, human hepatoma cell line; BHK21, normal healthy kidney cells; Caco-2, human colon carcinoma cell lines; Capan2, pancreatic adenocarcinoma cell line; CH1/PA-1, ovarian teratocarcinoma cell lines; CHO, normal Chinese hamster ovarian cells; CHO-K1, Chinese Hamster Ovary-K1 Cells; CNS cancer, Central nervous system cancer; Colo-829, human, umbilical metastasis, melanoma; CRL-2115, human skin fibroblast adherent; CT26, mouse colon carcinoma; DL, Dalton's ascites lymphoma; DLD-1, human colorectal adenocarcinoma cells; DU-145, human prostatic carcinoma; EA.hy926, human umbilical vein endothelial cell line; HaCaT, human keratinocyte cell line; HCT-116, colon cancer cell line; HCT-116 p53<sup>-/-</sup>, colon cancer cell line depleted p53; HEK-293T, human embryonic kidney cell lines; HeLa, cervical cancer cell line; HepG2, human liver cancer cell line; HFF-1, human skin cell lines; HL-60, human leukaemia; HT29, human colorectal adenocarcinoma cells; KMST-6, human skin fibroblast cell line; LCLC-103H, human lung carcinoma cells; LoVo, colorectal adenoma; LO2, human normal liver; MCF-7, human breast cancer cell line; MCF-10, human breast cancer cell lines; MDA-MD-435S, human breast cancer cell lines; MDB-MA-231, human breast cancer cell line; MES-OV, ovarian cancer cells; MIA PaCa-2, pancreatic carcinoma cell lines; MRC-5, human fetal lung fibroblast cells; OVCAR-3, ovarian adenocarcinoma cell line; Panc-1, pancreatic ductular adenocarcinoma cell line; PC3, human prostatic carcinoma; PNT2, normal prostate cell line; Saos, osteosarcoma cell line; SiHa, cervical cancer cell line; SISO, human uterine cervical adenocarcinoma cells; SKOV-3, human ovarian cancer cell line; SW620, human colon cell lines; U87, human glioblastoma cell lines; WHCO1, esophageal cancer cell line; WI-38, human fetal lung fibroblast cells.
