# Supplementary material for: A comprehensive survey of cytotoxic active half-sandwich Ir(iii) complexes: structural perspective, and mechanism of action
Source: Royal Society of Chemistry journal article supplement (doi:10.1039/d4dt03219e), 2025-01-01
Supplement: d4dt03219e3.pdf [file d4dt03219e3.pdf]

**Table S3** IC<sub>50</sub> values of **126–165** against cancer and normal cell lines, at different incubation time, mechanism of action, target and cell cycle arrest.

| Complex number                                          | Cell line/IC <sub>50</sub> (μM) <sup>1,2</sup> |             |             |                             |                         | Mechanism of action      | Cell Cycle arrest | Target                   | Ref. |
|---------------------------------------------------------|------------------------------------------------|-------------|-------------|-----------------------------|-------------------------|--------------------------|-------------------|--------------------------|------|
| <b>3.4. Polynuclear half-sandwich Ir(III) complexes</b> |                                                |             |             |                             |                         |                          |                   |                          |      |
| <b>3.4.1. N or P-ligands</b>                            |                                                |             |             |                             |                         |                          |                   |                          |      |
| <b>126a</b> *                                           | A2780                                          | 101.9       | A2780cisR   | > 200                       | HEK-293T <sup>(N)</sup> | 118.8                    |                   | n.d                      | 281  |
| <b>126b</b> *                                           |                                                | 97.0        |             | 45.5                        |                         | 148.5                    |                   |                          |      |
| <b>127a</b>                                             | WHCO1                                          |             | 111.5 ± 4.2 |                             |                         |                          | n.d               | DNA                      | 282  |
| <b>127b</b>                                             |                                                |             | 48.3 ± 8.8  |                             |                         |                          |                   |                          |      |
| <b>3.4.2. C^N ligands</b>                               |                                                |             |             |                             |                         |                          |                   |                          |      |
| <b>128a</b>                                             | A2780                                          | 29.7 ± 0.1  | A2780cisR   | 28.1 ± 2.0                  | HEK-293T <sup>(N)</sup> | n.d                      |                   | n.d                      | 283  |
| <b>128b</b> <sup>T</sup>                                |                                                | 13.7 ± 0.1  |             | 3.0 ± 0.2                   |                         | 5.0 ± 1.2                |                   |                          |      |
| <b>128c</b> <sup>T</sup>                                |                                                | 20.1 ± 13.6 |             | 19.0 ± 8.5                  |                         | 72.4 ± 91.1              |                   |                          |      |
| <b>3.4.3. N^N and N^O ligands</b>                       |                                                |             |             |                             |                         |                          |                   |                          |      |
| <b>129a</b>                                             | MCF-7 (Crystal violet); 3.5                    |             |             | HT-29 (Crystal violet); 1.8 |                         | DNA (mono-intercalation) | n.d               | DNA                      | 285  |
| <b>129b</b>                                             | n.d                                            |             |             |                             |                         |                          |                   |                          |      |
| <b>129c</b>                                             | MCF-7                                          |             | 3.1         | HT-29                       |                         | 3.8                      |                   | DNA (bis-intercalation)  |      |
| <b>129d</b>                                             |                                                |             | 0.109       |                             |                         | n.d                      |                   |                          |      |
| <b>130a</b>                                             | MCF-7<br>(Crystal violet)                      |             | 0.61        | HT-29<br>(Crystal violet)   |                         | 3.7                      | n.d               | DNA (mono-intercalation) | 123  |
| <b>130b</b>                                             |                                                |             | 7.9         |                             |                         | 12.7                     |                   |                          |      |
| <b>130c</b>                                             |                                                |             | 0.49        |                             |                         | 2.5                      |                   | DNA (mono-intercalation) |      |
| <b>130d</b>                                             |                                                |             | 3.8         |                             |                         | 4.2                      |                   |                          |      |
| <b>130e</b>                                             |                                                |             | 2.2         |                             |                         | 5.1                      |                   | DNA (bis-intercalation)  |      |
| <b>130f</b>                                             |                                                |             | 3.8         |                             |                         | 4.4                      |                   |                          |      |
| <b>131a</b>                                             | B16F10; 10.75 ± 1.3                            |             |             | PC3; 13.26 ± 1.6            |                         |                          | n.d               |                          | 287  |
|                                                         | THP1; 18.93 ± 2.5                              |             |             | SKOV-3; 15.12 ± 1.7         |                         |                          |                   |                          |      |
| <b>131b</b>                                             | B16F10; 40.32 ± 2.4                            |             |             | PC3; 34.14 ± 2.1            |                         |                          |                   |                          |      |

|                          |                                           |              |                  |                                          |                         |                |                   |                   |              |     |
|--------------------------|-------------------------------------------|--------------|------------------|------------------------------------------|-------------------------|----------------|-------------------|-------------------|--------------|-----|
|                          | THP1; n.d                                 |              |                  | SKOV-3; n.d                              |                         |                |                   |                   |              |     |
| <b>131c</b>              | B16F10; n.d                               |              |                  | PC3; 43.81 ± 2.6                         |                         |                |                   |                   |              |     |
|                          | THP1; n.d                                 |              |                  | SKOV-3; n.d                              |                         |                |                   |                   |              |     |
| <b>132a</b>              | n.d                                       |              |                  |                                          |                         |                | Apoptosis         | n.d               |              | 288 |
| <b>132b</b>              |                                           |              |                  |                                          |                         |                |                   |                   |              |     |
| <b>132c</b>              |                                           |              |                  |                                          |                         |                |                   |                   |              |     |
| <b>133a</b>              | HeLa<br>(WST-1)                           | 32.72 ± 2.19 | U87<br>(WST-1)   | 23.94 ± 1.91                             | WI 30<br>(WST-1)        | 589.57 ± 31.78 | DNA interaction   |                   | Cytoplasm    | 289 |
| <b>133b</b>              |                                           | 39.99 ± 1.29 |                  | 57.56 ± 2.32                             |                         | 89.04 ± 8.78   |                   |                   |              |     |
| <b>134a</b> <sup>T</sup> | HT-29; 52.17 ± 4.78                       |              |                  | HCT-116p53 <sup>-/-</sup> ; 46.88 ± 2.15 |                         |                |                   | n.d               |              | 290 |
|                          | HCT-116p53 <sup>+/+</sup> ; 41.08 ± 17.74 |              |                  | ARPE-19 <sup>(N)</sup> ; 60.65 ± 4.78    |                         |                |                   |                   |              |     |
| <b>134b</b> <sup>T</sup> | HT-29; 18.03 ± 3.26                       |              |                  | HCT-116p53 <sup>-/-</sup> ; 18.43 ± 0.24 |                         |                |                   |                   |              |     |
|                          | HCT-116p53 <sup>+/+</sup> ; 19.26 ± 0.81  |              |                  | ARPE-19 <sup>(N)</sup> ; 38.82 ± 13.68   |                         |                |                   |                   |              |     |
| <b>134c</b> <sup>*</sup> | HT-29; 53.51 ± 2.79                       |              |                  | HCT-116p53 <sup>-/-</sup> ; 58.00 ± 5.56 |                         |                |                   |                   |              |     |
|                          | HCT-116p53 <sup>+/+</sup> ; 57.84 ± 2.89  |              |                  | ARPE-19 <sup>(N)</sup> ; >100            |                         |                |                   |                   |              |     |
| <b>134d</b> <sup>*</sup> | HT-29; 37.32 ± 2.54                       |              |                  | HCT-116p53 <sup>-/-</sup> ; 57.19 ± 0.50 |                         |                |                   |                   |              |     |
|                          | HCT-116p53 <sup>+/+</sup> ; 52.63 ± 4.96  |              |                  | ARPE-19 <sup>(N)</sup> ; >100            |                         |                |                   |                   |              |     |
| <b>135a</b>              | A2780; 34.2 ± 0.6                         |              | MCF-7; > 50      |                                          | HT-29; > 50             |                |                   | n.d               |              | 291 |
|                          | A2780R; > 50                              |              | HOS; > 50        |                                          | PANC-1; > 50            |                |                   |                   |              |     |
| <b>135b</b>              | A2780; 3.1 ± 0.1                          |              | MCF-7; 6.0 ± 0.2 |                                          | HT-29; 25.7 ± 1.4       |                | ROS/RNS/Apoptosis | G <sub>2</sub> /M | Mitochondria |     |
|                          | A2780R; 3.8 ± 0.4                         |              | HOS; 6.8 ± 1.9   |                                          | PANC-1; 7.4 ± 1.2       |                |                   |                   |              |     |
| <b>136a</b>              | MCF-7; > 25                               |              | HepG2; > 25      |                                          | A375; > 25              |                | NADH              | n.d               |              | 292 |
|                          | A549; > 25                                |              | DU-145; > 25     |                                          |                         |                |                   |                   |              |     |
| <b>136b</b>              | MCF-7; > 25                               |              | HepG2; 12.6      |                                          | A375; > 25              |                |                   |                   |              |     |
|                          | A549; 16.5                                |              | DU-145; >25      |                                          |                         |                |                   |                   |              |     |
| <b>136c</b>              | MCF-7; > 25                               |              | HepG2; > 25      |                                          | A375; > 25              |                |                   |                   |              |     |
|                          | A549; > 25                                |              | DU-145; > 25     |                                          |                         |                |                   |                   |              |     |
| <b>137</b>               | n.d                                       |              |                  |                                          |                         |                |                   | n.d               |              | 293 |
| <b>138a</b>              | A2780                                     | 40 ± 2       | A2780cisR        | 60 ± 6                                   | HEK-293T <sup>(N)</sup> | n.d            |                   |                   |              | 294 |
| <b>138b</b> <sup>T</sup> |                                           | 2.6 ± 0.5    |                  | 8.9 ± 1.2                                |                         | 10.2 ± 0.5     |                   |                   |              |     |
| <b>138c</b> <sup>T</sup> |                                           | 0.75 ± 0.01  |                  | 3.5 ± 0.3                                |                         | 28.6 ± 1.3     |                   |                   |              |     |
| <b>138d</b>              |                                           | 66 ± 5.2     |                  | 33.8 ± 3.8                               |                         | n.d            |                   |                   |              |     |
| <b>138e</b>              |                                           | 40 ± 3       |                  | 48 ± 4                                   |                         | n.d            |                   |                   |              |     |
| <b>138f</b>              |                                           | 55.1 ± 0.2   |                  | 49.0 ± 1.6                               |                         | n.d            |                   |                   |              |     |
| <b>139a</b>              |                                           | 11.58 ± 4.35 |                  | 41.45 ± 3.28                             |                         | 84.40 ± 1.16   |                   | n.d               |              | 295 |

|                                      |                            |                                     |                                      |                                     |                            |                                                          |                    |              |     |     |
|--------------------------------------|----------------------------|-------------------------------------|--------------------------------------|-------------------------------------|----------------------------|----------------------------------------------------------|--------------------|--------------|-----|-----|
| <b>139b</b>                          | A2780<br>(WST-1)           | 30.79 ± 1.16                        | A2780cisR<br>(WST-1)                 | 50.49 ± 3.08                        | KMST-6<br>(WST-1)          | 85.04 ± 3.64                                             |                    |              |     |     |
| <b>139c</b>                          |                            | 141.88 ± 1.19                       |                                      | 80.20 ± 1.71                        |                            | 100.54 ± 5.01                                            |                    |              |     |     |
| <b>139d</b>                          |                            | 107.00 ± 3.95                       |                                      | 109.91 ± 5.92                       |                            | 116.20 ± 4.35                                            |                    |              |     |     |
| <b>140a</b>                          | WHCO1                      | > 300                               |                                      |                                     |                            |                                                          | n.d                |              | 296 |     |
| <b>140b</b>                          |                            | 58.0 ± 19.3                         |                                      |                                     |                            |                                                          | n.d                |              | 297 |     |
| <b>140c</b>                          |                            | 59.6 ± 23.7                         |                                      |                                     |                            |                                                          |                    |              |     |     |
| <b>140d</b>                          |                            | 49.5 ± 19.0                         |                                      |                                     |                            |                                                          |                    |              |     |     |
| <b>140e</b>                          |                            | > 270                               |                                      |                                     |                            |                                                          |                    |              |     |     |
| <b>141a</b>                          |                            | 200.8 ± 9.9                         |                                      |                                     |                            |                                                          | n.d                |              | 296 |     |
| <b>141b</b>                          |                            | 13.0 ± 9.0                          |                                      |                                     |                            |                                                          | n.d                |              | 297 |     |
| <b>141c</b>                          |                            | 6.2 ± 4.5                           |                                      |                                     |                            |                                                          |                    |              |     |     |
| <b>141d</b>                          |                            | 9.6 ± 4.6                           |                                      |                                     |                            |                                                          |                    |              |     |     |
| <b>141e</b>                          |                            | 49.5 ± 16.7                         |                                      |                                     |                            |                                                          |                    |              |     |     |
| <b>3.4.4. O<sup>+</sup>O ligands</b> |                            |                                     |                                      |                                     |                            |                                                          |                    |              |     |     |
| <b>142a<sup>T</sup></b>              | A2780                      | 0.07 ± 0.01                         | A2780cisR                            | 0.25 ± 0.05                         | HEK-293T <sup>(N)</sup>    | 0.09 ± 0.02                                              |                    | n.d          |     | 298 |
| <b>142b<sup>T</sup></b>              |                            | 0.13 ± 0.02                         |                                      | 0.31 ± 0.04                         |                            | 0.11 ± 0.02                                              |                    |              |     |     |
| <b>142c<sup>T</sup></b>              |                            | 0.17 ± 0.01                         |                                      | 0.29 ± 0.03                         |                            | 0.10 ± 0.02                                              |                    |              |     |     |
| <b>143a<sup>T</sup></b>              | DU-145; 16.0 ± 0.4         |                                     | HeLa; 4.16 ± 0.3                     |                                     |                            | n.d                                                      | n.d                | DNA          | 299 |     |
|                                      | A549; 3.18 ± 0.2           |                                     | HEK-293T <sup>(N)</sup> ; 31.2 ± 0.5 |                                     |                            |                                                          |                    |              |     |     |
| <b>143b<sup>T</sup></b>              | DU-145; 2.53 ± 0.2         |                                     | HeLa; 1.04 ± 0.3                     |                                     |                            |                                                          |                    |              |     |     |
|                                      | A549; 0.84 ± 0.1           |                                     | HEK-293T <sup>(N)</sup> ; 40.3 ± 0.4 |                                     |                            |                                                          |                    |              |     |     |
| <b>143c<sup>T</sup></b>              | DU-145; 0.72 ± 0.2         |                                     | HeLa; 0.59 ± 0.2                     |                                     |                            |                                                          | Sub-G <sub>1</sub> |              |     |     |
|                                      | A549; 0.67 ± 0.4           |                                     | HEK-293T <sup>(N)</sup> ; 70.8 ± 0.4 |                                     |                            |                                                          |                    |              |     |     |
| <b>144<sup>T</sup></b>               | MCF-7; 1.0 ± 0.2           | A549; 0.7 ± 0.2                     |                                      | CRL-2120 <sup>(N)</sup> ; 1.2 ± 0.2 |                            |                                                          | n.d                |              | 300 |     |
|                                      | B16F10; 0.8 ± 0.3          | CRL-2115 <sup>(N)</sup> ; 1.2 ± 0.3 |                                      |                                     |                            |                                                          |                    |              |     |     |
| <b>145<sup>T</sup></b>               | MCF-7; 0.7 ± 0.2           | A549; 0.7 ± 0.4                     |                                      | CRL-2120 <sup>(N)</sup> ; 1.1 ± 0.4 |                            | ROS (irradiation with UV)/DNA Cleavage/<br>MMP/Apoptosis | sub-G <sub>1</sub> | Mitochondria |     |     |
|                                      | B16F10; 0.7 ± 0.4          | CRL-2115 <sup>(N)</sup> ; 1.1 ± 0.4 |                                      |                                     |                            |                                                          |                    |              |     |     |
| <b>146a</b>                          | A549 (WST-1); 59.88 ± 2.69 | HeLa (WST-1); 42.39 ± 3.34          |                                      | WI-38 (WST-1); 11.67 ± 0.11         |                            | ROS                                                      | sub-G <sub>1</sub> | DNA          | 301 |     |
|                                      | MCF-7 (WST-1); 3.79 ± 0.12 | U87 (WST-1); 61.45 ± 3.64           |                                      |                                     |                            |                                                          |                    |              |     |     |
| <b>146b</b>                          | A549 (WST-1); 3.30 ± 0.14  |                                     | HeLa (WST-1); 2.22 ± 0.07            |                                     | WI-38 (WST-1); 2.10 ± 0.17 |                                                          |                    |              |     |     |

|                            |                                     |              |                                     |                                       |                        |              |               |                    |                                          |
|----------------------------|-------------------------------------|--------------|-------------------------------------|---------------------------------------|------------------------|--------------|---------------|--------------------|------------------------------------------|
|                            | MCF-7 (WST-1); 1.82 ± 0.06          |              | U87 (WST-1); 0.54 ± 0.07            |                                       |                        |              |               |                    |                                          |
| <b>146c</b>                | HeLa<br>(WST-1)                     | > 500        | U87<br>(WST-1)                      | > 400                                 | WI-38<br>(WST-1)       | 93.79 ± 8.45 | n.d           | DNA                | 302                                      |
| <b>146d</b>                |                                     | 2.13 ± 0.16  |                                     | 2.83 ± 0.13                           |                        | 2.80 ± 0.13  |               |                    |                                          |
| <b>147a</b>                |                                     | > 4000       |                                     | > 900                                 |                        | > 900        |               |                    |                                          |
| <b>147b</b>                |                                     | 11.65 ± 0.81 |                                     | 8.28 ± 0.09                           |                        | 7.01 ± 0.21  |               |                    |                                          |
| <b>148a</b>                | HT-29 (24h)                         |              | 1.0 ± 0.1                           | HT-29 (48h);                          |                        | 0.8 ± 0.1    | n.d           | ROS                | 303                                      |
| <b>148b</b>                |                                     |              | 0.8 ± 0.1                           |                                       |                        | 0.6 ± 0.1    |               |                    |                                          |
| <b>149<sup>*</sup> (A)</b> | MCF-7; 86 ± 4                       |              |                                     | A549; 82 ± 4                          |                        |              | n.d           |                    | 304                                      |
|                            | B16; 71 ± 4                         |              |                                     | NIH 3T3 <sup>(N)</sup> ; 116 ± 5      |                        |              |               |                    |                                          |
| <b>150a<sup>T</sup></b>    | A549; 4.0 ± 0.4                     |              |                                     | Hela; 4.0 ± 0.6                       |                        |              | n.d           |                    | 305                                      |
|                            | MCF-7; 3.0 ± 0.4                    |              |                                     | NIH 3T3 <sup>(N)</sup> ; 5.0 ± 1.4    |                        |              |               |                    |                                          |
| <b>150b<sup>T</sup></b>    | A549; 3.0 ± 0.4                     |              |                                     | Hela; 2.0 ± 0.3                       |                        |              | MMP/Apoptosis | Sub-G <sub>1</sub> | Mitochondria\<br>ds-DNA<br>intercalation |
|                            | MCF-7; 1.3 ± 0.3                    |              |                                     | NIH 3T3 <sup>(N)</sup> ; 1.0 ± 0.8    |                        |              |               |                    |                                          |
| <b>150c<sup>T</sup></b>    | A549; 5.0 ± 0.8                     |              |                                     | Hela; 4.0 ± 0.6                       |                        |              | n.d           |                    |                                          |
|                            | MCF-7; 4.0 ± 0.7                    |              |                                     | NIH 3T3 <sup>(N)</sup> ; 4.0 ± 0.6    |                        |              |               |                    |                                          |
| <b>151a</b>                | n.d                                 |              |                                     |                                       |                        |              |               |                    |                                          |
| <b>151b</b>                |                                     |              |                                     |                                       |                        |              |               |                    |                                          |
| <b>151c</b>                |                                     |              |                                     |                                       |                        |              |               |                    |                                          |
| <b>151d</b>                | HCT-116 (SRB); 0.38 ± 0.04          |              |                                     | SiHa (SRB); 0.75 ± 0.1                |                        |              | S phase       |                    | 306                                      |
|                            | NCI-H460 (SRB); 0.21 ± 0.05         |              |                                     | SW480 (SRB); 0.88 ± 0.09              |                        |              |               |                    |                                          |
| <b>• Chalcogen</b>         |                                     |              |                                     |                                       |                        |              |               |                    |                                          |
| <b>152a<sup>*</sup></b>    | BE; 23.13 ± 3.83                    |              |                                     | MIA-Pa-Ca2; > 100                     |                        |              | n.d           |                    | 307                                      |
|                            | HT-29; > 100                        |              |                                     | ARPE-19 <sup>(N)</sup> ; > 100        |                        |              |               |                    |                                          |
| <b>152b<sup>T</sup></b>    | BE; 36.29 ± 8.68                    |              |                                     | MIA-Pa-Ca2; 17.12 ± 4.58              |                        |              |               |                    |                                          |
|                            | HT-29; 49.55 ± 2.97                 |              |                                     | ARPE-19 <sup>(N)</sup> ; 59.71 ± 1.75 |                        |              |               |                    |                                          |
| <b>153a<sup>T</sup></b>    | A549                                | 7.44 ± 1.05  | HeLa                                | 6.43 ± 1.02                           | BEAS-2B <sup>(N)</sup> | 13.01 ± 0.33 | n.d           |                    | 308                                      |
| <b>153b<sup>T</sup></b>    |                                     | 12.56 ± 0.05 |                                     | 10.46 ± 0.50                          |                        | 24.60 ± 0.23 |               |                    |                                          |
| <b>153c<sup>T</sup></b>    |                                     | 4.98 ± 0.15  |                                     | 5.43 ± 0.49                           |                        | 9.98 ± 0.45  |               |                    |                                          |
| <b>153d<sup>T</sup></b>    |                                     | 3.79 ± 1.15  |                                     | 6.43 ± 0.01                           |                        | 11.50 ± 0.31 |               |                    |                                          |
| <b>154a<sup>*</sup></b>    | 0.442 ± 6                           |              | B16F10; 0.319 ± 5                   |                                       | MCF-7; 0.582 ± 6       |              | ROS/Apoptosis | G <sub>2</sub>     | DNA                                      |
|                            | CRL-2115 <sup>(N)</sup> ; 1.024 ± 5 |              | CRL-2120 <sup>(N)</sup> ; 1.136 ± 4 |                                       |                        |              |               |                    |                                          |
| <b>154b<sup>*</sup></b>    | A549; 0.472 ± 5                     |              | B16F10; 0.358 ± 6                   |                                       | MCF-7; 0.597 ± 7       |              | n.d           |                    |                                          |

|                          |                                     |              |                                     |                  |                         |              |                   |                                |                         |          |     |
|--------------------------|-------------------------------------|--------------|-------------------------------------|------------------|-------------------------|--------------|-------------------|--------------------------------|-------------------------|----------|-----|
|                          | CRL-2115 <sup>(N)</sup> ; 1.037 ± 7 |              | CRL-2120 <sup>(N)</sup> ; 1.232 ± 6 |                  |                         |              |                   |                                |                         |          |     |
| <b>154c</b> *            | A549; 0.456 ± 4                     |              | B16F10; 0.341 ± 5                   | MCF-7; 0.587 ± 4 |                         |              |                   |                                |                         |          |     |
|                          | CRL-2115 <sup>(N)</sup> ; 1.025 ± 8 |              | CRL-2120 <sup>(N)</sup> ; 1.187 ± 8 |                  |                         |              |                   |                                |                         |          |     |
| <b>154d</b> *            | A549; 0.453 ± 5                     |              | B16F10; 0.354 ± 7                   | MCF-7; 0.568 ± 6 |                         |              |                   |                                |                         |          |     |
|                          | CRL-2115 <sup>(N)</sup> ; 1.028 ± 7 |              | CRL-2120 <sup>(N)</sup> ; 1.254 ± 7 |                  |                         |              |                   |                                |                         |          |     |
| <b>154e</b> *            | A549; 0.446 ± 6                     |              | B16F10; 0.346 ± 5                   | MCF-7; 0.552 ± 5 |                         |              |                   |                                |                         |          |     |
|                          | CRL-2115 <sup>(N)</sup> ; 1.017 ± 8 |              | CRL-2120 <sup>(N)</sup> ; 1.215 ± 6 |                  |                         |              |                   |                                |                         |          |     |
| <b>155a</b> <sup>T</sup> | A2780                               | 0.09 ± 0.01  | A2780cisR                           | 0.06 ± 0.01      | HEK-293T <sup>(N)</sup> | 0.08 ± 0.01  |                   |                                | 310                     |          |     |
| <b>155b</b> <sup>T</sup> |                                     | 0.11 ± 0.02  |                                     | 0.06 ± 0.01      |                         | 0.09 ± 0.02  |                   |                                |                         |          |     |
| <b>155c</b> <sup>T</sup> |                                     | 0.43 ± 0.01  |                                     | 0.66 ± 0.05      |                         | 1.24 ± 0.06  |                   |                                |                         |          |     |
| <b>156a</b> <sup>T</sup> | A2780                               | 0.07 ± 0.01  | HEK-293T <sup>(N)</sup>             | 0.03 ± 0.01      |                         |              |                   | 311                            |                         |          |     |
| <b>156b</b> <sup>T</sup> |                                     | 0.04 ± 0.01  |                                     | 0.03 ± 0.01      |                         |              |                   |                                |                         |          |     |
| <b>156c</b> <sup>T</sup> |                                     | 0.06 ± 0.01  |                                     | 0.03 ± 0.01      |                         |              |                   |                                |                         |          |     |
| <b>156d</b> <sup>T</sup> |                                     | 0.05 ± 0.01  |                                     | 0.08 ± 0.01      |                         |              |                   |                                |                         |          |     |
| <b>156e</b> <sup>T</sup> |                                     | 0.03 ± 0.01  |                                     | 0.07 ± 0.01      |                         |              |                   |                                |                         |          |     |
| • Ferrocene              |                                     |              |                                     |                  |                         |              |                   |                                |                         |          |     |
| <b>157a</b>              | A549                                | 50.09 ± 0.12 | HeLa                                | 75.56 ± 1.20     | BEAS-2B <sup>(N)</sup>  | 82.51 ± 1.33 |                   |                                | 143                     |          |     |
| <b>157b</b> *            |                                     | 59.88 ± 0.08 |                                     | 77.90 ± 1.03     |                         | > 100        |                   |                                |                         |          |     |
| <b>157c</b> <sup>T</sup> |                                     | 27.58 ± 0.23 |                                     | 19.89 ± 1.09     |                         | 73.11 ± 1.17 | G <sub>2</sub> /M |                                |                         |          |     |
| <b>157d</b> *            |                                     | 41.28 ± 0.10 |                                     | 22.47 ± 0.63     |                         | > 100        |                   |                                |                         |          |     |
| <b>157e</b> <sup>T</sup> |                                     | 6.03 ± 0.05  |                                     | 9.50 ± 0.56      |                         | 33.85 ± 0.35 | <b>2B</b>         | G <sub>1</sub> /G <sub>0</sub> |                         | Lysosome |     |
| <b>157f</b> <sup>T</sup> |                                     | 8.52 ± 0.18  |                                     | 9.86 ± 0.96      |                         | 47.85 ± 0.19 | <b>2B</b>         |                                |                         |          |     |
| <b>158a</b> <sup>T</sup> | A549                                | 8.44 ± 0.59  | A549/DDP                            | 14.57 ± 0.98     | BEAS-2B <sup>(N)</sup>  | 27.16 ± 0.96 | <b>1B</b>         | G <sub>1</sub> /G <sub>0</sub> | Lysosome                | 312      |     |
| <b>158b</b> <sup>T</sup> |                                     | 12.19 ± 0.92 |                                     | 12.48 ± 1.05     |                         | 31.50 ± 0.61 | n.d.              |                                |                         |          |     |
| <b>159a</b> <sup>T</sup> |                                     | 30.34 ± 4.88 | HeLa                                | 21.42 ± 0.81     |                         | 33.48 ± 0.41 | <b>1B</b>         | n.d.                           | G <sub>2</sub> /M phase | Lysosome | 313 |
| <b>159b</b> <sup>T</sup> |                                     | 19.90 ± 0.66 |                                     | 13.90 ± 0.79     |                         | 23.66 ± 0.72 |                   |                                |                         |          |     |
| <b>159c</b> <sup>T</sup> |                                     | 6.70 ± 0.40  |                                     | 7.42 ± 0.41      |                         | 8.06 ± 0.03  |                   |                                |                         |          |     |
| <b>159d</b> <sup>T</sup> |                                     | 4.81 ± 0.27  |                                     | 5.51 ± 0.10      |                         | 7.32 ± 0.42  |                   |                                |                         |          |     |
| <b>160</b>               | DI; > 110                           |              |                                     |                  |                         | Apoptosis    | n.d.              | DNA                            | 315                     |          |     |
| <b>161a</b> <sup>T</sup> | 46.4 ± 2.5                          |              | 59.0 ± 0.6                          |                  | 35.9 ± 3.4              |              | n.d.              |                                | 316                     |          |     |

|                          |                                      |                                        |           |                                       |                         |                   |               |                                |                    |     |
|--------------------------|--------------------------------------|----------------------------------------|-----------|---------------------------------------|-------------------------|-------------------|---------------|--------------------------------|--------------------|-----|
| <b>161b</b> <sup>T</sup> | A2780                                | 11.7 ± 0.3                             | A2780cisR | 7.6 ± 1.3                             | HEK-293T <sup>(N)</sup> | 13.6 ± 2.0        |               |                                |                    |     |
| <b>161c</b> <sup>T</sup> |                                      | 39.6 ± 3.0                             |           | 36.7 ± 0.2                            |                         | 31.1 ± 0.3        |               |                                |                    |     |
| <b>162a</b> <sup>T</sup> | A549                                 | 33.1 ± 1.6                             | HeLa      | 13.1 ± 0.6                            | BEAS-2B <sup>(N)</sup>  | 12.5 ± 1.6        |               | n.d                            |                    | 75  |
| <b>162b</b> <sup>T</sup> |                                      | 18.1 ± 1.2                             |           | 12.5 ± 0.5                            |                         | 12.3 ± 0.9        |               |                                |                    |     |
| <b>162c</b> <sup>T</sup> |                                      | 8.9 ± 1.7                              |           | 10.5 ± 0.5                            |                         | 10.3 ± 2.3        | <b>2A</b>     | G <sub>0</sub> /G <sub>1</sub> | Mitochondria       |     |
| <b>• Heteronuclear</b>   |                                      |                                        |           |                                       |                         |                   |               |                                |                    |     |
| <b>163a</b> <sup>*</sup> | Caco-2                               | 11 ± 1.0                               | HeLa      | 23.4 ± 0.9                            | HEK-293T <sup>(N)</sup> | > 200             | MMP/Apoptosis | G <sub>2</sub> /M              | Mitochondria & DNA | 318 |
| <b>163b</b> <sup>*</sup> |                                      | 23 ± 2.1                               |           | > 100                                 |                         | > 200             |               | n.d                            |                    |     |
| <b>163c</b> <sup>*</sup> |                                      | 8 ± 0.8                                |           | 70.5 ± 0.8                            |                         | > 200             |               |                                |                    |     |
| <b>163d</b> <sup>*</sup> |                                      | 2.2 ± 0.4                              |           | 14.2 ± 1.2                            |                         | > 200             | MMP/Apoptosis | G <sub>2</sub> /M              | Mitochondria & DNA |     |
| <b>164a</b> <sup>*</sup> | A549; 35.5 ± 5.6 × 10 <sup>-3</sup>  | MCF-7; 35.3 ± 6.5                      |           | DU-145; 12.8 ± 2.7 × 10 <sup>-7</sup> |                         | Apoptosis         | S phase       | Nuclei                         | 319                |     |
| 24h                      | WM2664; 5.2 ± 4.1 × 10 <sup>-3</sup> | HEK-293T <sup>(N)</sup> ; 786.8 ± 11.2 |           |                                       |                         |                   |               |                                |                    |     |
| <b>164a</b> <sup>*</sup> | A549; 42.4 ± 7.3 × 10 <sup>-5</sup>  | MCF-7; > 1000                          |           | DU-145; 125.7 ± 3.4                   |                         |                   |               |                                |                    |     |
| 72h                      | WM2664; 137.1 ± 2.2                  | HEK-293T <sup>(N)</sup> ; 886.8 ± 12.7 |           |                                       |                         |                   |               |                                |                    |     |
| <b>164b</b> <sup>*</sup> | A549; 11.2 ± 7.8 × 10 <sup>-3</sup>  | MCF-7; 30.0 ± 0.7                      |           | DU-145; 10.8 ± 1.9 × 10 <sup>-4</sup> |                         |                   |               |                                |                    |     |
| 24h                      | WM2664; 9.9 ± 3.8 × 10 <sup>-3</sup> | HEK-293T <sup>(N)</sup> ; 756.8 ± 5.7  |           |                                       |                         |                   |               |                                |                    |     |
| <b>164b</b> <sup>*</sup> | A549; 36.6 ± 2.8 × 10 <sup>-3</sup>  | MCF-7; > 1000                          |           | DU-145; 122.7 ± 5.4                   |                         |                   |               |                                |                    |     |
| 72h                      | WM2664; 155.1 ± 3.2                  | HEK-293T <sup>(N)</sup> ; 856.8 ± 15.9 |           |                                       |                         |                   |               |                                |                    |     |
| <b>164c</b> <sup>*</sup> | A549; 31.6 ± 7.6 × 10 <sup>-3</sup>  | MCF-7; 24.2 ± 7.2                      |           | DU-145; 14.2 ± 2.4 × 10 <sup>-3</sup> |                         |                   |               |                                |                    |     |
| 24h                      | WM2664; 10.1 ± 2.2 × 10 <sup>3</sup> | HEK-293T <sup>(N)</sup> ; 775.8 ± 15.7 |           |                                       |                         |                   |               |                                |                    |     |
| <b>164c</b> <sup>*</sup> | A549; 36.0 ± 2.2 × 10 <sup>-2</sup>  | MCF-7; > 1000                          |           | DU-145; 126.2 ± 4.4                   |                         |                   |               |                                |                    |     |
| 72h                      | WM2664; 229.3 ± 25.9                 | HEK-293T <sup>(N)</sup> ; 822.8 ± 12.3 |           |                                       |                         |                   |               |                                |                    |     |
| <b>164d</b> <sup>*</sup> | A549; 18.1 ± 1.3 × 10 <sup>-3</sup>  | MCF-7; 10.5 ± 0.8                      |           | DU-145; 10.1 ± 2.9 × 10 <sup>-3</sup> |                         |                   |               |                                |                    |     |
| 24h                      | WM2664; 6.2 ± 2.4 × 10 <sup>-3</sup> | HEK-293T <sup>(N)</sup> ; 676.8 ± 9.2  |           |                                       |                         |                   |               |                                |                    |     |
| <b>164d</b> <sup>*</sup> | A549; 0.6 ± 2.9 × 10 <sup>-4</sup>   | MCF-7; > 1000                          |           | DU-145; 53.6 ± 0.40                   |                         |                   |               |                                |                    |     |
| 72h                      | WM2664; 212.2 ± 10.5                 | HEK-293T <sup>(N)</sup> ; 776.8 ± 15.3 |           |                                       |                         |                   |               |                                |                    |     |
| <b>165</b>               | MDA-MB-468; 24.12 ± 1.1              |                                        |           | <b>2A</b>                             |                         | G <sub>2</sub> /M | Mitochondria  | 320                            |                    |     |

<sup>1</sup> IC<sub>50</sub> is defined as the concentration of drug required to inhibit cell growth by 50% compared to the control. Each value represents the mean ± standard deviation from two or three independent experiments.

<sup>2</sup> Cell viability was determined by the MTT assay, other than this is mentioned.

<sup>T</sup>: The complex was examined against normal cell line; <sup>\*</sup>: The complex was safe to the tested normal cell with IC<sub>50</sub> > 100 µM; <sup>N</sup>: Normal cell line; n.d: not determined.

Mechanism of action according to [Fig. 3](#) (within the main text): **1A** pathway: NADH/ROS/MMP/Apoptosis. **1B** pathway: NADH/ROS/LMP/Apoptosis. **1AB** pathway: NADH/ROS/MMP/LMP/Apoptosis. **2A** pathway: ROS/MMP/Apoptosis.

**Full names and Abbreviations of Cell lines:** 16HBE, human bronchial epithelial cell lines; 518A2, human melanoma cell line; 5637, human bladder cancer cells; 8505C, human thyroid carcinoma; ARPE-19, human retinal epithelial cells; A253, human submandibular gland carcinoma; A2780, human ovarian carcinoma cell lines; A2780R/A2780cisR; Cisplatin resistant human ovarian; A427, human lung carcinoma cells; A549, Human lung carcinoma cell line; A549R, cisplatin resistant human lung carcinoma cell line; BEAS-2B, human non-tumorigenic lung epithelial cell line; BEL-7402, human hepatoma cell line; BHK21, normal healthy kidney cells; Caco-2, human colon carcinoma cell lines; Capan2, pancreatic adenocarcinoma cell line; CH1/PA-1, ovarian teratocarcinoma cell lines; CHO, normal Chinese hamster ovarian cells; CHO-K1, Chinese Hamster Ovary-K1 Cells; CNS cancer, Central nervous system cancer; Colo-829, human, umbilical metastasis, melanoma; CRL-2115, human skin fibroblast adherent; CT26, mouse colon carcinoma; DL, Dalton's ascites lymphoma; DLD-1, human colorectal adenocarcinoma cells; DU-145, human prostatic carcinoma; EA.hy926, human umbilical vein endothelial cell line; HaCaT, human keratinocyte cell line; HCT-116, colon cancer cell line; HCT-116 p53<sup>-/-</sup>, colon cancer cell line depleted p53; HEK-293T, human embryonic kidney cell lines; HeLa, cervical cancer cell line; HepG2, human liver cancer cell line; HFF-1, human skin cell lines; HL-60, human leukaemia; HT29, human colorectal adenocarcinoma cells; KMST-6, human skin fibroblast cell line; LCLC-103H, human lung carcinoma cells; LoVo, colorectal adenoma; LO2, human normal liver; MCF-7, human breast cancer cell line; MCF-10, human breast cancer cell lines; MDA-MD-435S, human breast cancer cell lines; MDB-MA-231, human breast cancer cell line; MES-OV, ovarian cancer cells; MIA PaCa-2, pancreatic carcinoma cell lines; MRC-5, human fetal lung fibroblast cells; OVCAR-3, ovarian adenocarcinoma cell line; Panc-1, pancreatic ductular adenocarcinoma cell line; PC3, human prostatic carcinoma; PNT2, normal prostate cell line; Saos, osteosarcoma cell line; SiHa, cervical cancer cell line; SISO, human uterine cervical adenocarcinoma cells; SKOV-3, human ovarian cancer cell line; SW620, human colon cell lines; U87, human glioblastoma cell lines; WHCO1, esophageal cancer cell line; WI-38, human fetal lung fibroblast cells.
